# Supplementary material for: Poly ADP-ribosylation of SET8 leads to aberrant H4K20 methylation in mammalian nuclear genome
Source: PubMed Central journal article supplement (PMC9700808; doi:10.1038/s42003-022-04241-8), 2022-11-25
Supplement: 42003_2022_4241_MOESM2_ESM.pdf [file 42003_2022_4241_MOESM2_ESM.pdf]

## Supplementary materials

### **Poly ADP-ribosylation of SET8 leads to aberrant H4K20 methylation in mammalian nuclear genome**

Pierre-Olivier Estève \*, Sagnik Sen\*, Vishnu US, Cristian Ruse<sup>1</sup>, Hang Gyeong Chin and Sriharsa Pradhan\*\*

New England Biolabs Inc, 240 County Road, Ipswich, MA 01938, USA

\* Equal contribution to the work.

Note: "Supplementary Figure" designations are indicated on top of the figures as "Fig. S"

Fig. S1

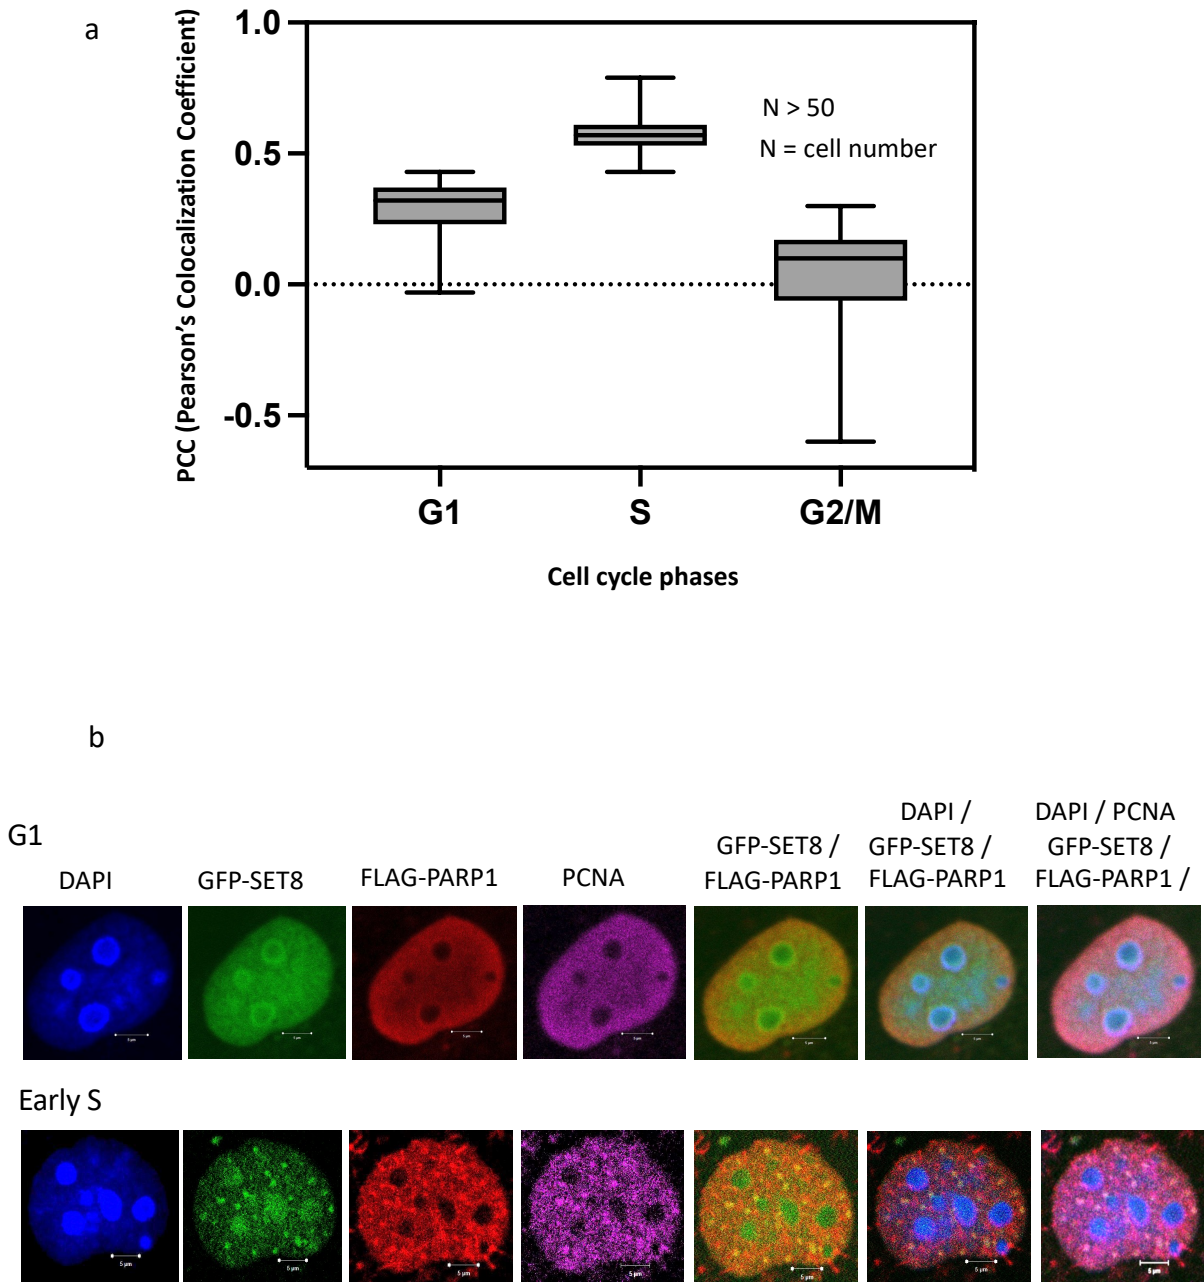

Supplementary Figure 1: Cell cycle dependent colocalization kinetics between GFP-SET8 and FLAG-PARP1. (a) Boxplot of Pearson's correlation coefficient (PCC) of cells in G1, S and G2/M. (b) Synchronized cells displaying PCNA association with SET8 and PARP1 at the onset of S-phase of the cell cycle with punctate colocalization pattern.

Fig. S2

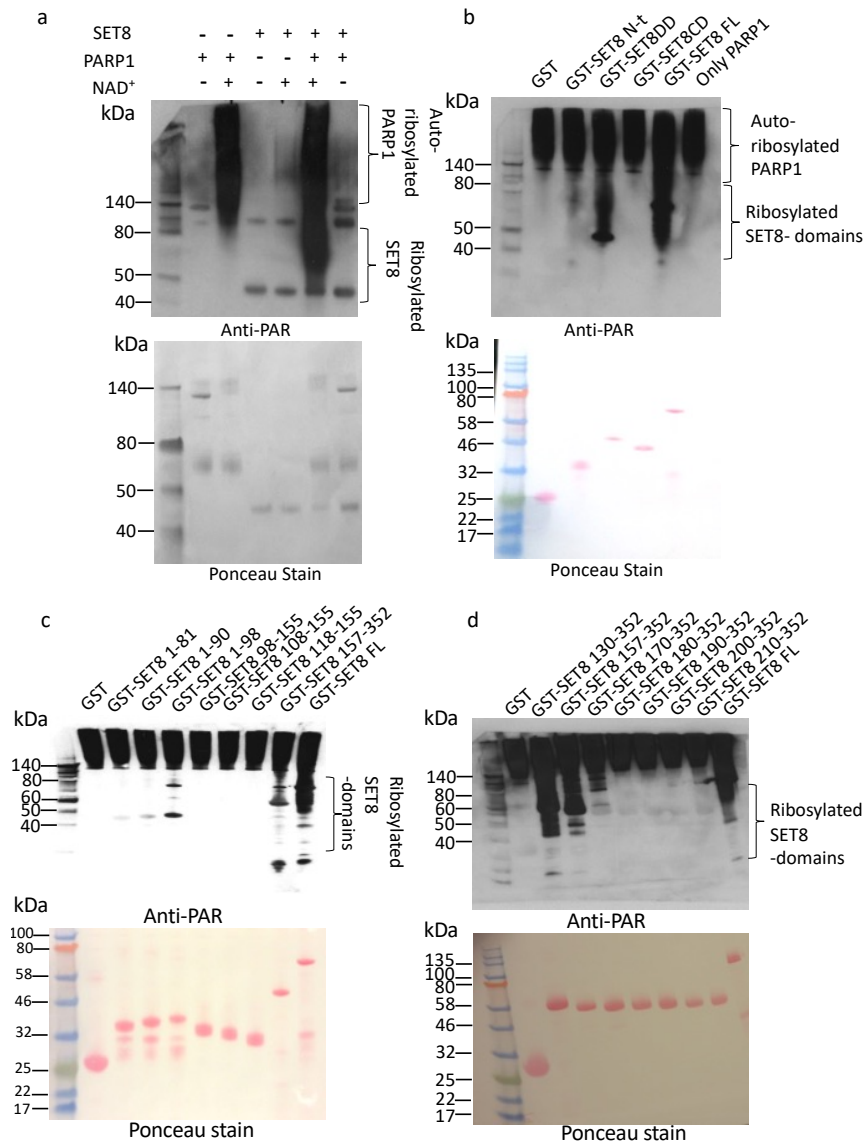

Supplementary Figure 2: Detail poly ADP-ribosylation mapping of SET8. (a) Full length SET8 is poly ADP ribosylated by PARP1. The enzymatic in vitro reaction was separated using SDS-PAGE, western blotted and probed with anti-PAR antibody. The shifted SET8 band shows the ADP-ribosylated SET8 (top). Loading of the exact blot shown using ponceau staining (bottom). (b) ADP-ribosylation of various SET8 domain in the presence of PARP1. The ribosylated SET8 GST-SET8 N-t (1-98), GST-SET8 DD (157-352) domains as well as GST-SET8 FL are shown by western blotting using anti-PAR antibody (top). Loading of the exact blot shown using ponceau staining (bottom). (c) ADP-ribosylation of various GST-SET8 regions in the presence of PARP1. GST-SET8 N-t (1-98), GST-SET8 DD (157-352) and GST-SET8 FL show ribosylation (top). Loading of the exact blot shown using ponceau staining (bottom). (d) Detailed ADP-ribosylation analysis of various truncated SET8 regions between amino acids 130-352 in the presence of PARP1. GST-SET8 (130-152), GST-SET8 (157-352), GST-SET8 (170-352) as well as GST-SET8 FL shows ADP-ribosylation (top). Loading of the exact blot shown using ponceau staining (bottom).

Fig. S3a

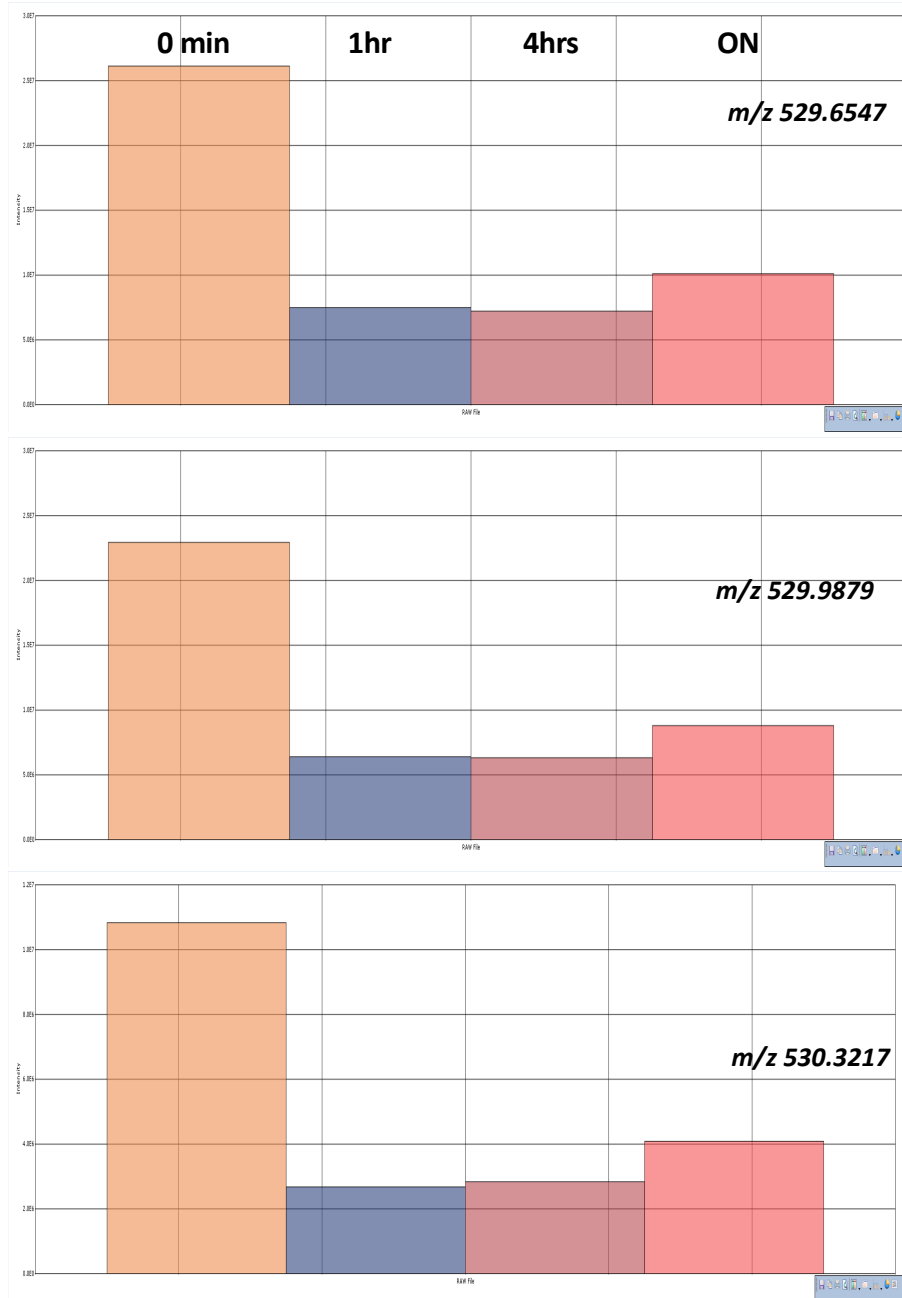

KPLAGIYRKREEK-NH2  
[M+3H]<sup>3+</sup>



Fig. S3b

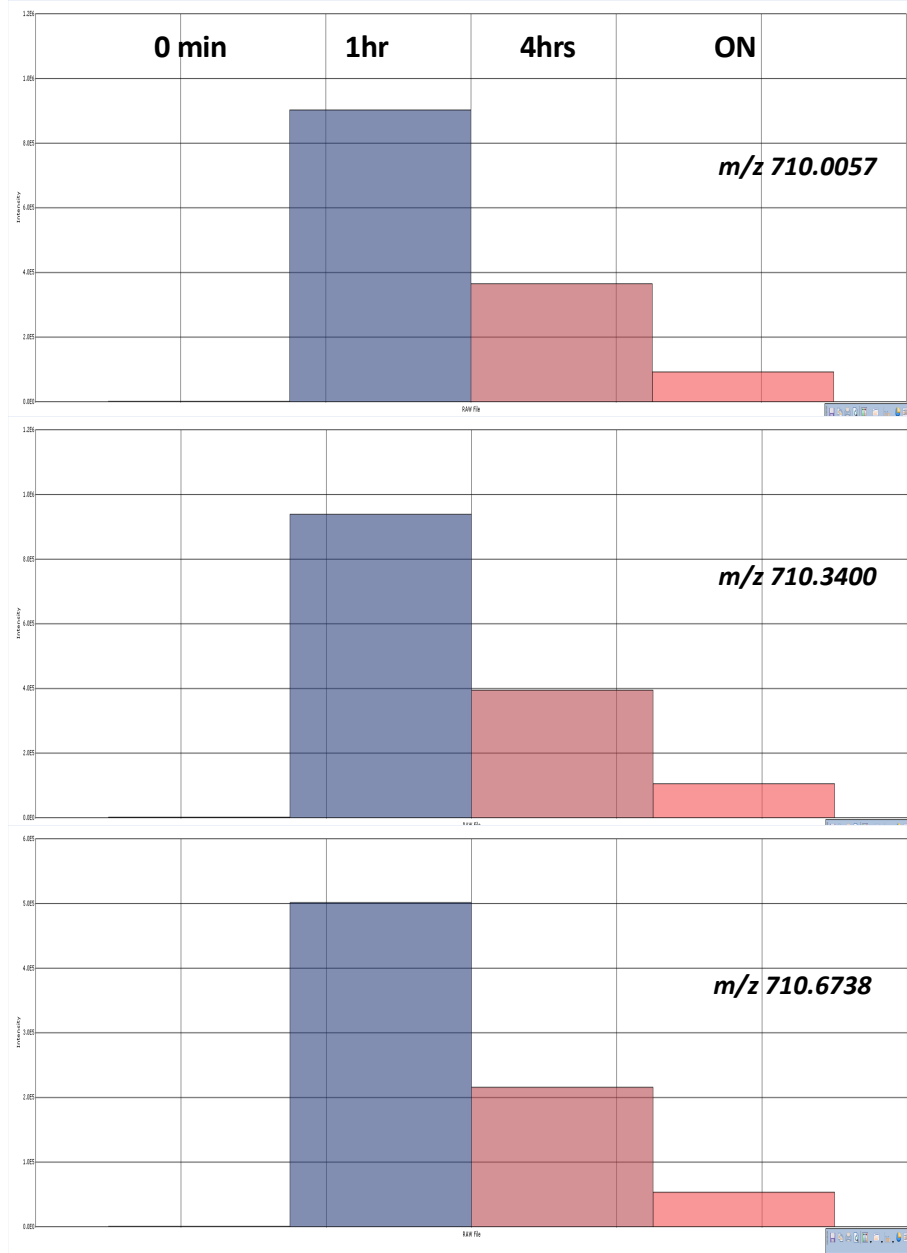

(ADPr)KPLAGIYRKREEK-NH2  
[M+3H]3+

Fig. S3c

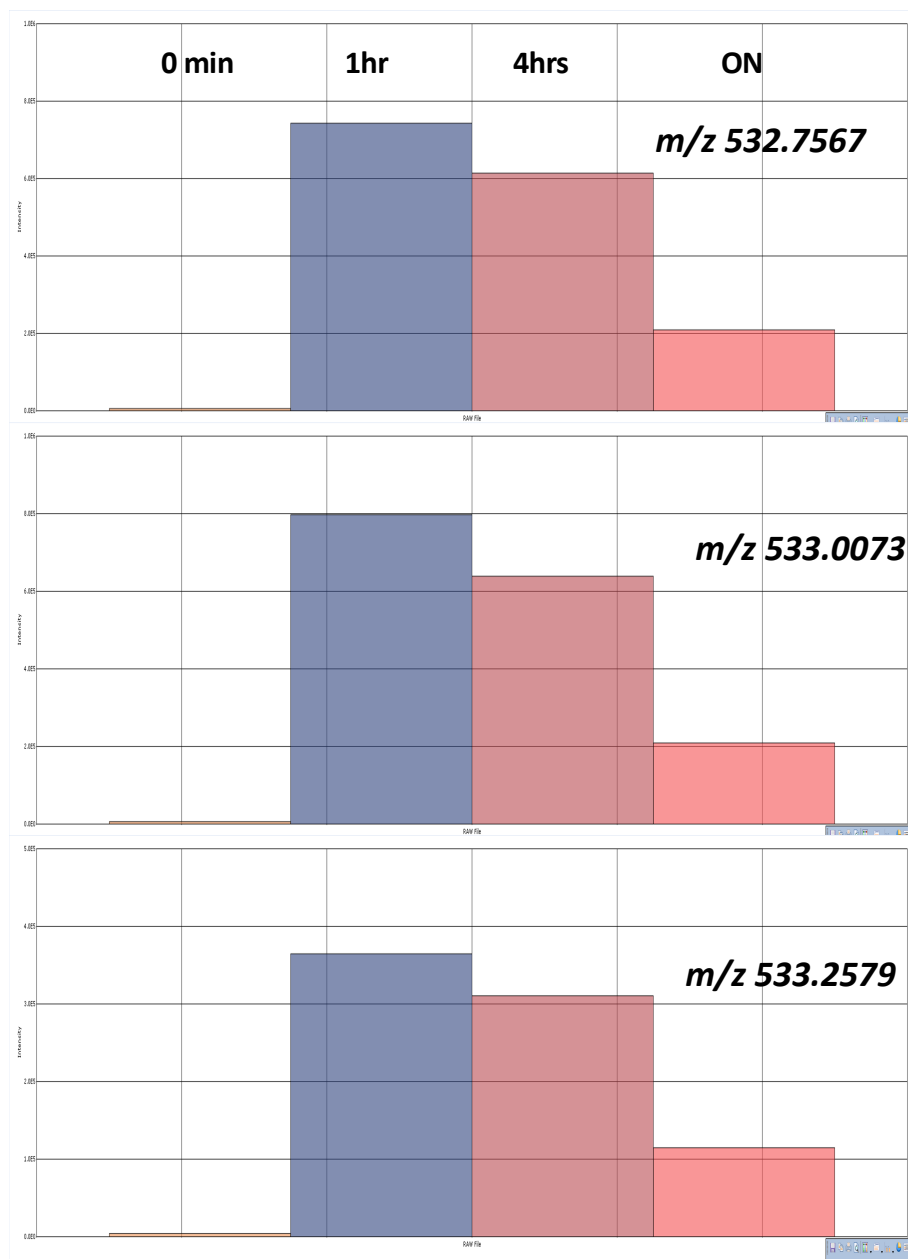

(ADPr)KPLAGIYRKREEK-NH2  
[M+4H]4+

Fig. S3d

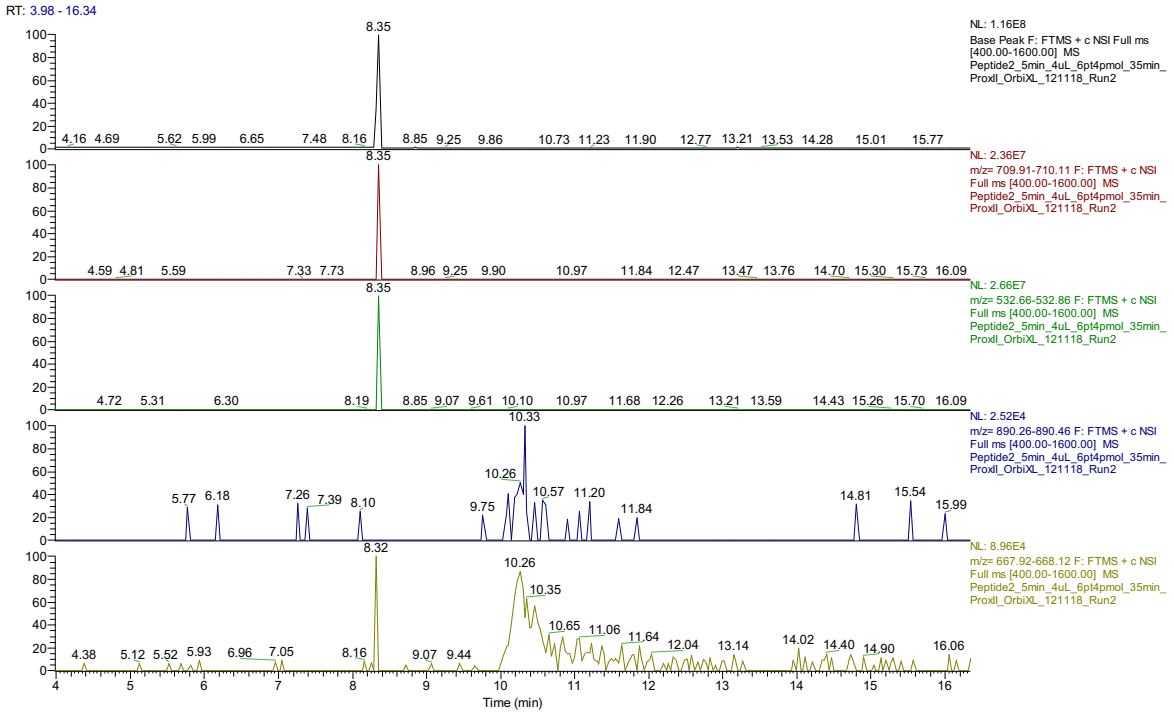

KPLAGIYRKREEK-NH2 peptide mono and di-ADP ribose conjugated forms detected at 5min reaction with PARP1

Fig. S3e

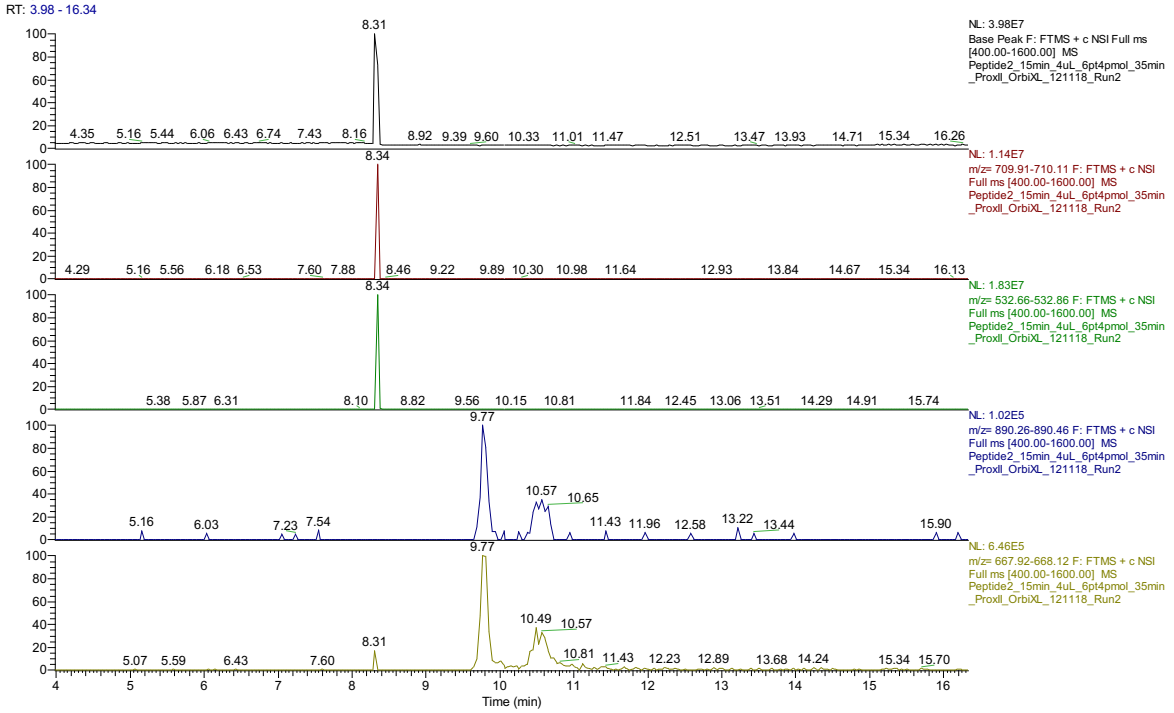

KPLAGIYRKREEK-NH2 peptide mono and diADPribo conjugated forms detected at 15min reaction with PARP1

Supplementary Figure 3: Characterization of ADP-ribosylation of SET8 synthetic peptide KPLAGIYRKREEK-NH<sub>2</sub> using high resolution mass spectrometry and isotope quantification in nanoLC. (a) Quantification of peptide KPLAGIYRKREEK-NH<sub>2</sub> (charge +3) at four time points: 0 min (negative control), 1hr, 4hrs and overnight (ON) reaction with PARP1. Peak areas were determined with SIEVE software package for the three main isotopes m/z 529.65449, m/z 529.98877 and m/z 530.32300, theoretical values determined with Protein Prospector MS Isotope. The figure displays the measured isotopes 0, 1 and 2 with Orbitrap MS. (b) Quantification of peptide (ADPr)KPLAGIYRKREEK-NH<sub>2</sub> (charge +3) at four time points: 0 min (negative control), 1hr, 4hrs and overnight (ON) reaction with PARP1. Peak areas were determined with SIEVE software package for the three main isotopes m/z 710.00819, m/z 710.34247 and m/z 710.67670, theoretical values determined with Protein Prospector MS Isotope. The figure displays the measured isotopes 0, 1 and 2 with Orbitrap MS. (c) Quantification of peptide (ADPr)KPLAGIYRKREEK-NH<sub>2</sub> (charge +4) at four time points: 0 min (negative control), 1hr, 4hrs and overnight (ON) reaction with PARP1. Peak areas were determined with SIEVE software package for the three main isotopes m/z 532.75796, m/z 533.00867 and m/z 533.25934, theoretical values determined with Protein Prospector MS Isotope. The figure displays the measured isotopes 0, 1 and 2 with Orbitrap MS. (d) Chromatographic profile of the main isotopes of (1ADPr) KPLAGIYRKREEK-NH<sub>2</sub> and (2ADPr) KPLAGIYRKREEK-NH<sub>2</sub> detected at 5 min reaction with PARP1. (e) Chromatographic profile of the main isotopes of (1ADPr) KPLAGIYRKREEK-NH<sub>2</sub> and (2ADPr) KPLAGIYRKREEK-NH<sub>2</sub> detected at 15 min reaction with PARP1.

Fig. S4a

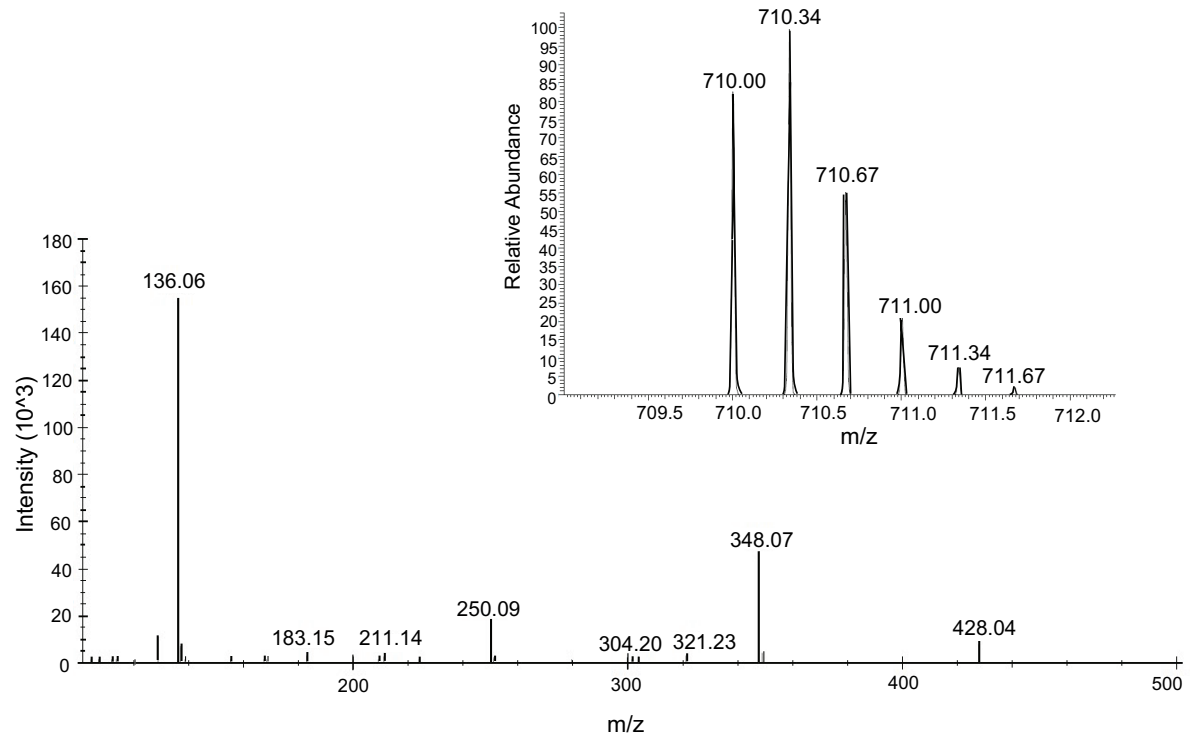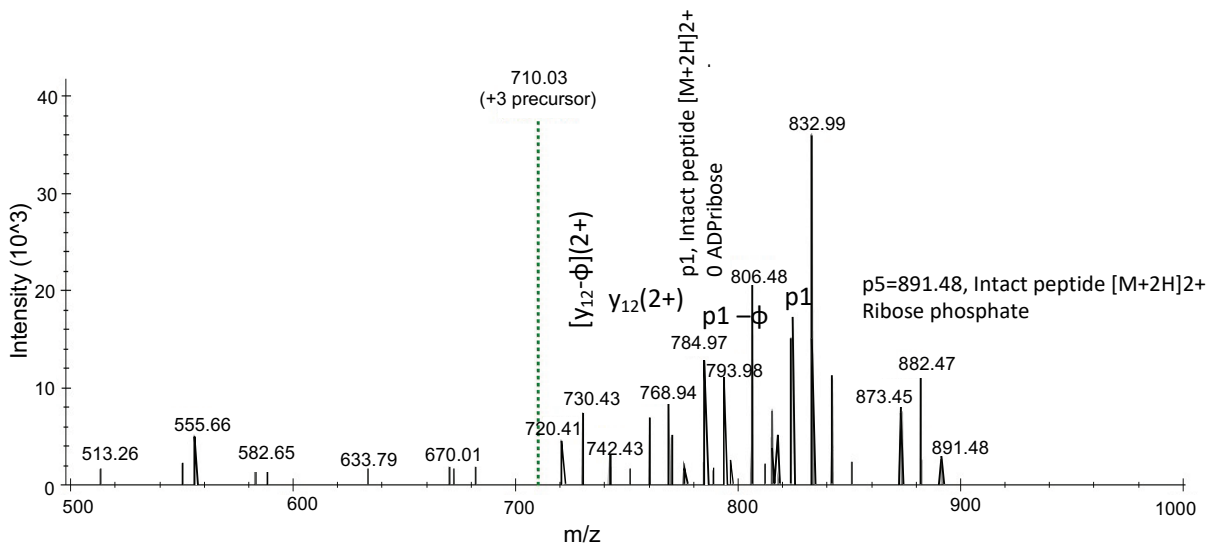

Fig. S4b

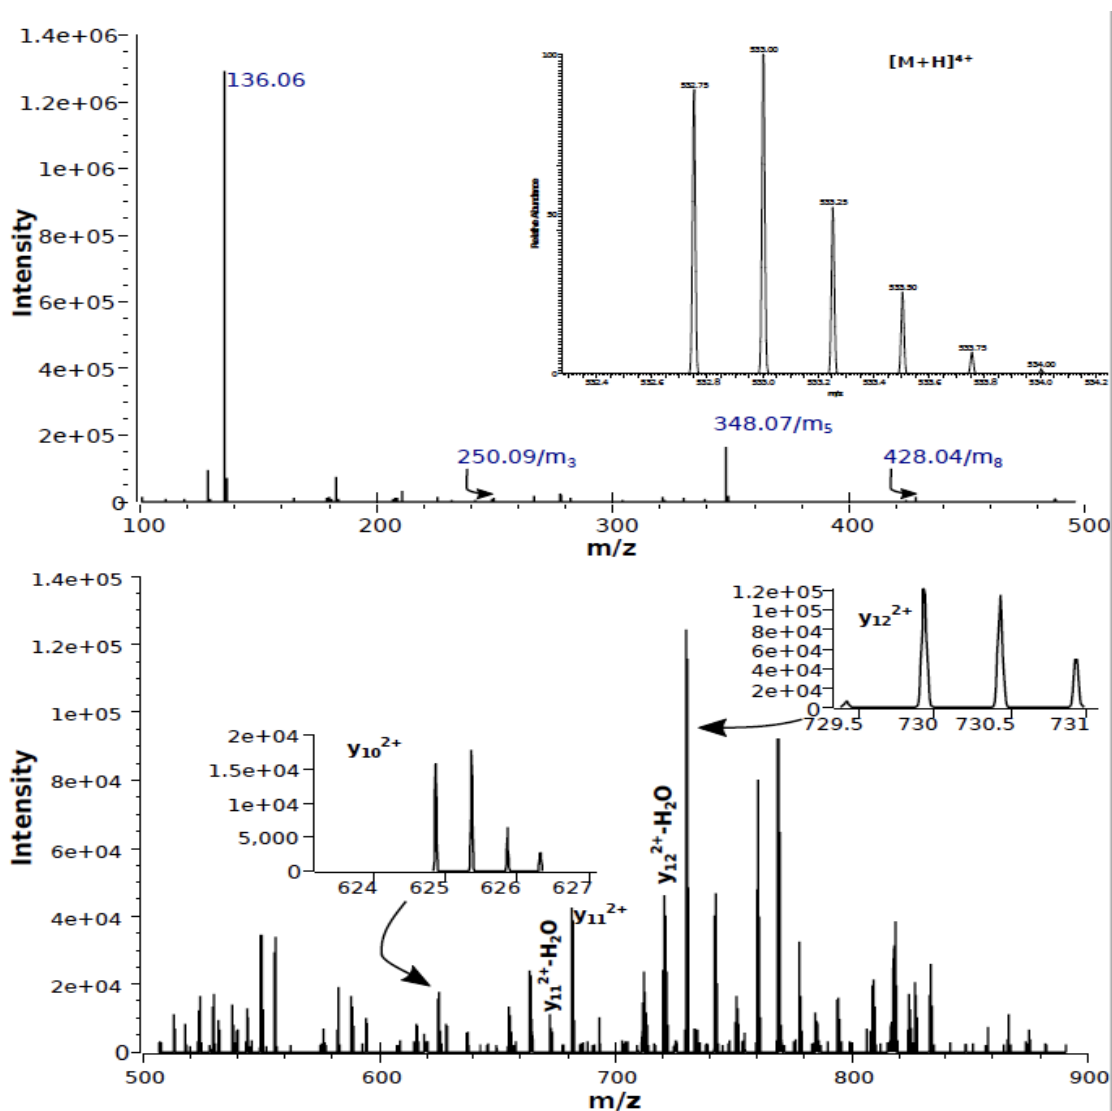

Supplementary Figure 4: Characterization of ADP-ribosylation of SET8 synthetic peptide KPLAGIYRKREEK-NH<sub>2</sub> using high resolution/high accuracy MS/MS HCD fragmentation,  $[M+3H]^{3+}$  precursor  $m/z$  710.00 and  $[M+4H]^{4+}$  precursor  $m/z$  532.75. (a) Characteristics ADP-ribose modification fragmentation ions (m-ions peptide free modification fragment ions):  $m_1=136.1$ ,  $m_3=250$ ,  $m_5=348$ ,  $m_8=428$  (top panel). Ion  $m/z$  136.1 could be sourced from either tyrosine immonium ion ( $m/z$  136.0762) or [adenine+H]<sup>+</sup> ( $m/z$  136.0623). Fragment ions with intact peptide p1 and intact peptide with ribose phosphate p5 are shown on the bottom panel,  $m/z$  500 - 900. The nomenclature for ADP-ribosylation fragment ions is according to (Hengel et al, 2009). Inset shows the  $[M+3H]^{3+}$  precursor full scan MS spectrum. (b) Similar to charge state +3, fragmented precursor charge state +4 showed characteristics ADP-ribose modification fragment ions. Increased intensity sequencing ions are present in the bottom panel,  $m/z$  500 - 900. Inset shows the  $[M+4H]^{4+}$  precursor full scan MS spectrum.

Fig. S5

(ADPr)KPLAGIYRKREEK-NH2 [M+3H]<sup>3+</sup> m/z 710.008

|                     | <b>Score</b> | <b>Matches</b> |
|---------------------|--------------|----------------|
| K(ADPr)PLAGIYRKREEK | 199.2        | 41             |
| KPLAGIYR(ADPr)KREEK | 90.5         | 30             |
| KPLAGIYRK(ADPr)REEK | 86.2         | 30             |
| KPLAGIYRKR(ADPr)EEK | 86.2         | 30             |
| KPLAGIYRKRE(ADPr)EK | 76.3         | 29             |
| KPLAGIYRKREE(ADPr)K | 113          | 33             |
| KPLAGIYRKREEK(ADPr) | 117          | 34             |

(ADPr)KPLAGIYRKREEK-NH2 [M+4H]<sup>4+</sup> m/z 532.75

|                     | <b>Score</b> | <b>Matches</b> |
|---------------------|--------------|----------------|
| K(ADPr)PLAGIYRKREEK | 159.6        | 37             |
| KPLAGIYR(ADPr)KREEK | 48.3         | 20             |
| KPLAGIYRK(ADPr)REEK | 60.4         | 22             |
| KPLAGIYRKR(ADPr)EEK | 53           | 21             |
| KPLAGIYRKRE(ADPr)EK | 60.3         | 23             |
| KPLAGIYRKREE(ADPr)K | 82.6         | 27             |
| KPLAGIYRKREEK(ADPr) | 109.6        | 31             |

Supplementary Figure 5: Characterization of ADP-ribosylation of SET8 synthetic peptide KPLAGIYRKREEK-NH2 using MS/MS CID fragmentation. [M+3H]<sup>3+</sup> precursor m/z 710.008 and [M+4H]<sup>4+</sup> precursor m/z 532.75 are shown. Scoring of ion propensity matches of the ADPr unit relative to seven possible amino acid locations in CID MS/MS spectra of (ADPr)KPLAGIYRKREEK-NH2.

Fig. S6a

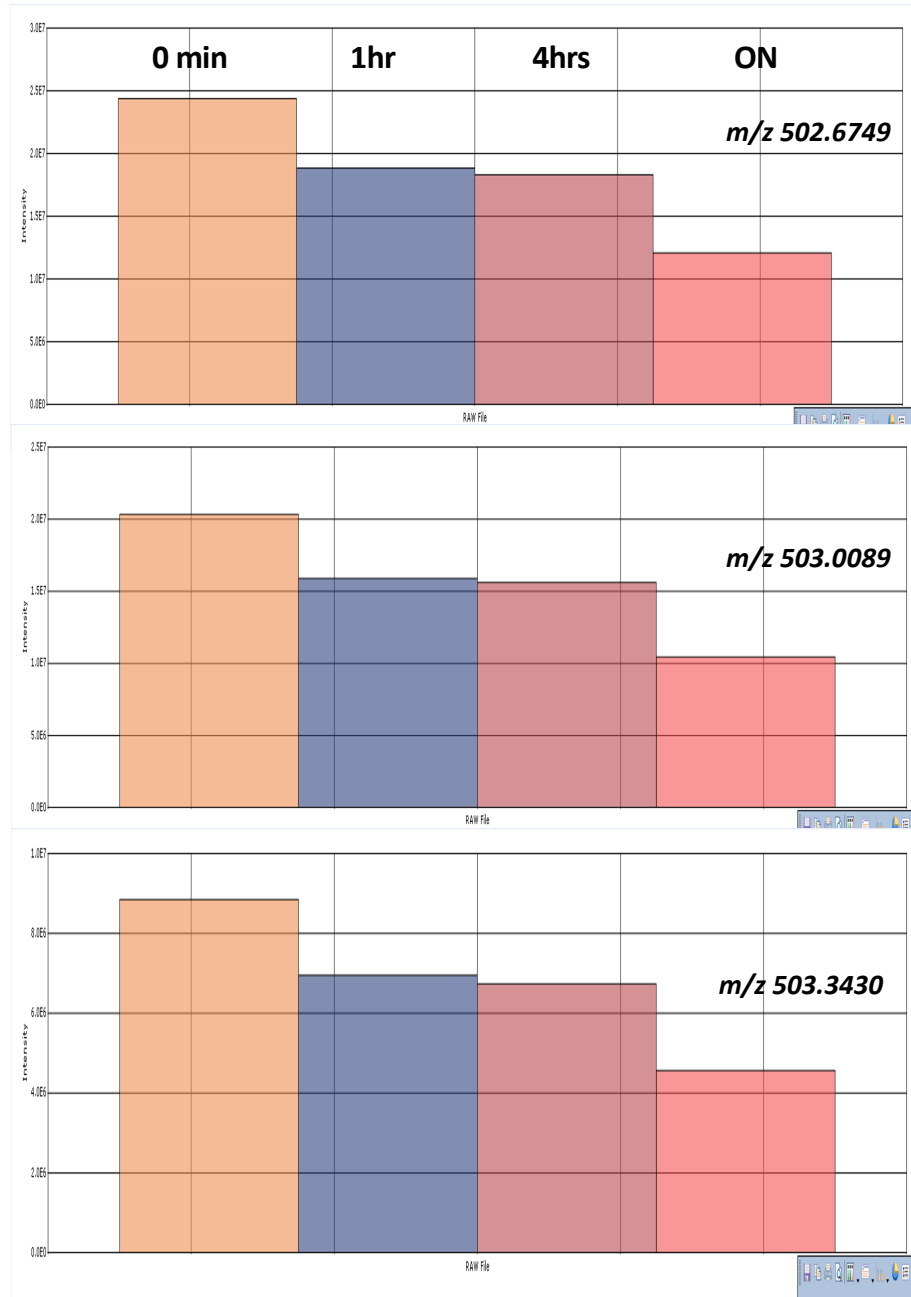

KKPIKGKQAPRKK-NH2  
[M+3H]<sup>3+</sup>



Fig. S6b

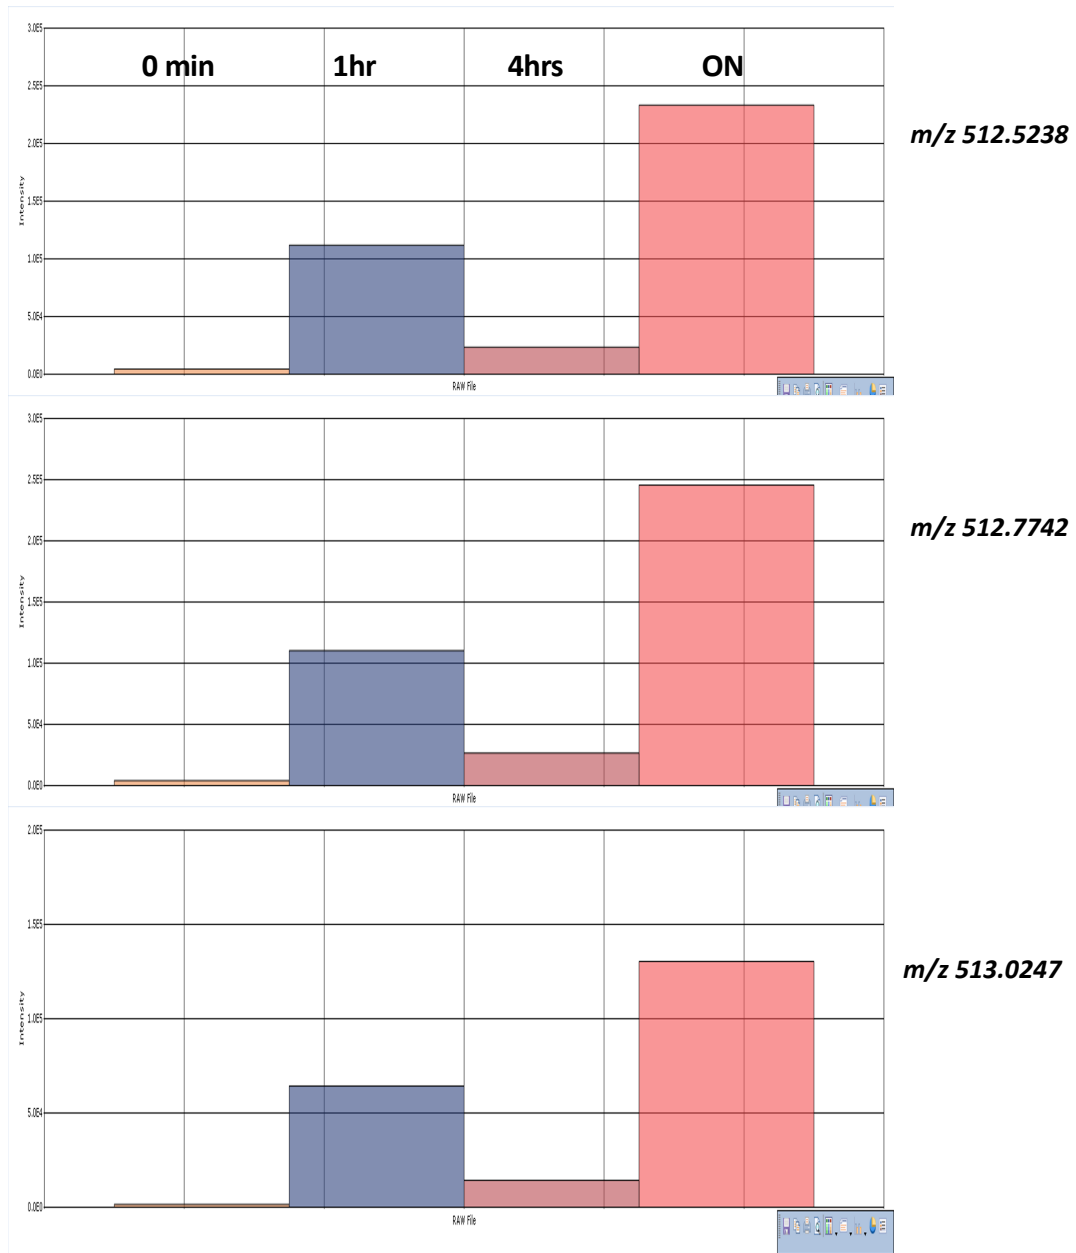

(ADPr)KKPIKGKQAPRKK-NH2  
[M+4H]<sup>4+</sup>

Supplementary Figure 6: Characterization of ADP-ribosylation of SET8 synthetic peptide KKPIKGKQAPRKK-NH<sub>2</sub> using high resolution mass spectrometry and isotope quantification in nanoLC. (a) Quantification of peptide KKPIKGKQAPRKK-NH<sub>2</sub> (charge +3) at four time points: 0 min (negative control), 1hr, 4 hrs and overnight (ON) reaction with PARP1. Peak areas were determined with SIEVE software package for the three main isotopes m/z 502.67534, m/z 503.00960 and m/z 503.34383, theoretical values determined with Protein Prospector MS Isotope. The figure displays the measured isotopes 0, 1 and 2 with Orbitrap MS. (b) Quantification of peptide (ADPr)KKPIKGKQAPRKK-NH<sub>2</sub> (charge +4) at four time points: 0 min (negative control), 1hr, 4 hrs and overnight (ON) reaction with PARP1. Peak areas were determined with SIEVE software package for the three main isotopes m/z 512.52360, m/z 512.77430 and m/z 513.02497, theoretical values determined with Protein Prospector MS Isotope. The figure displays the measured isotopes 0, 1 and 2 with Orbitrap MS.

Fig. S7

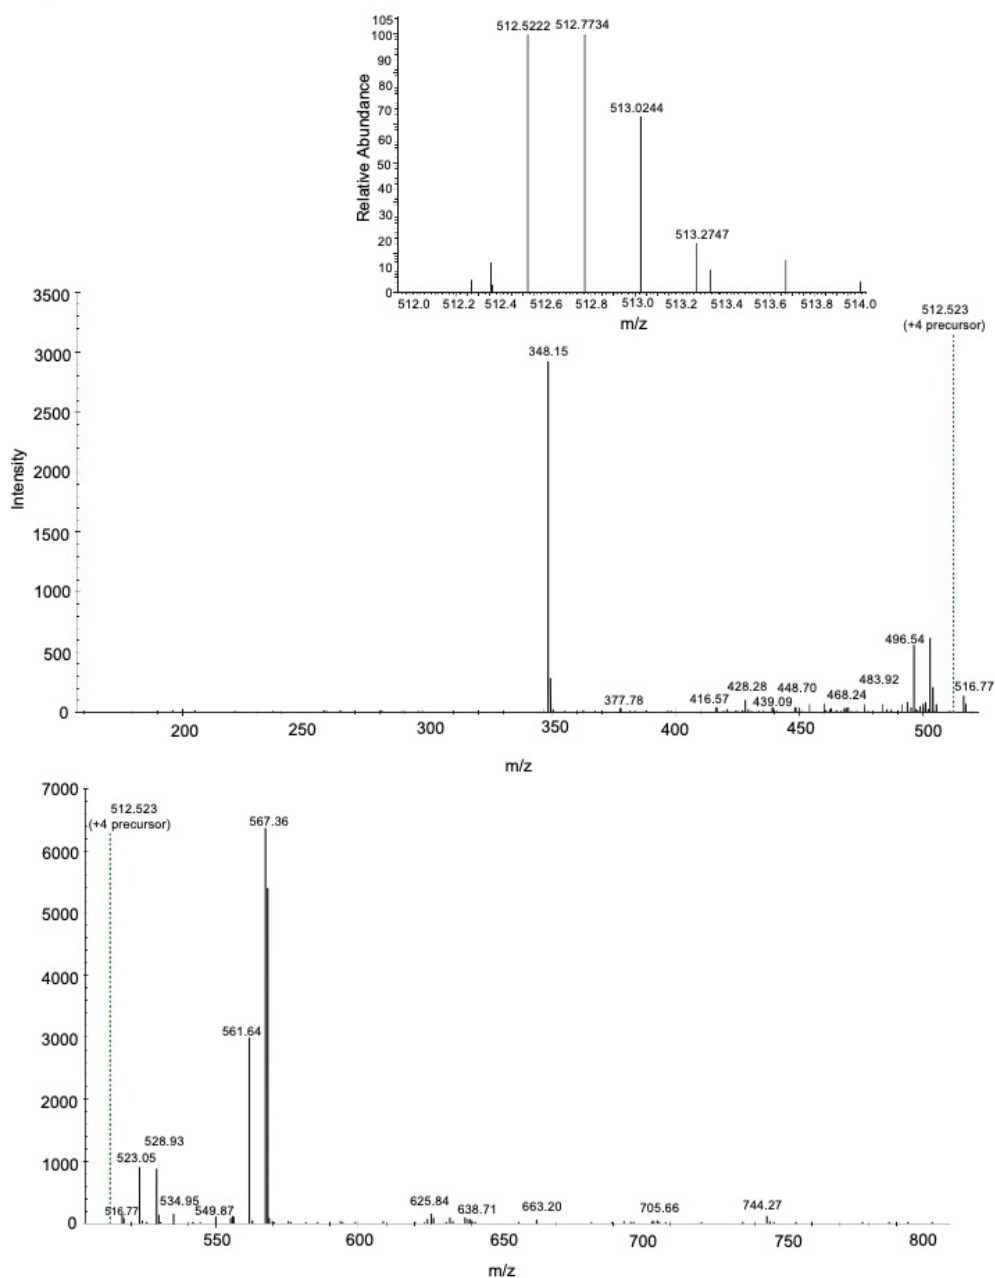

Supplementary Figure 7: Characterization of ADP-ribosylation of SET8 synthetic peptide KKPIKGKQAPRKK-NH<sub>2</sub> using MS/MS CID fragmentation, [M+4H]<sup>4+</sup> precursor m/z 512.52. Characteristics ADP-ribose modification fragmentation ions (m-ions peptide free modification fragment ions): m<sub>5</sub>=348 and m<sub>8</sub>=428 (top panel). Fragment peptide ions are present most probably due to neutral loss of ADP-ribose fragments, within the unit resolution on linear ion trap MS/MS spectra (bottom panel). Inset shows the [M+4H]<sup>4+</sup> precursor full scan MS spectrum.

Fig. S8

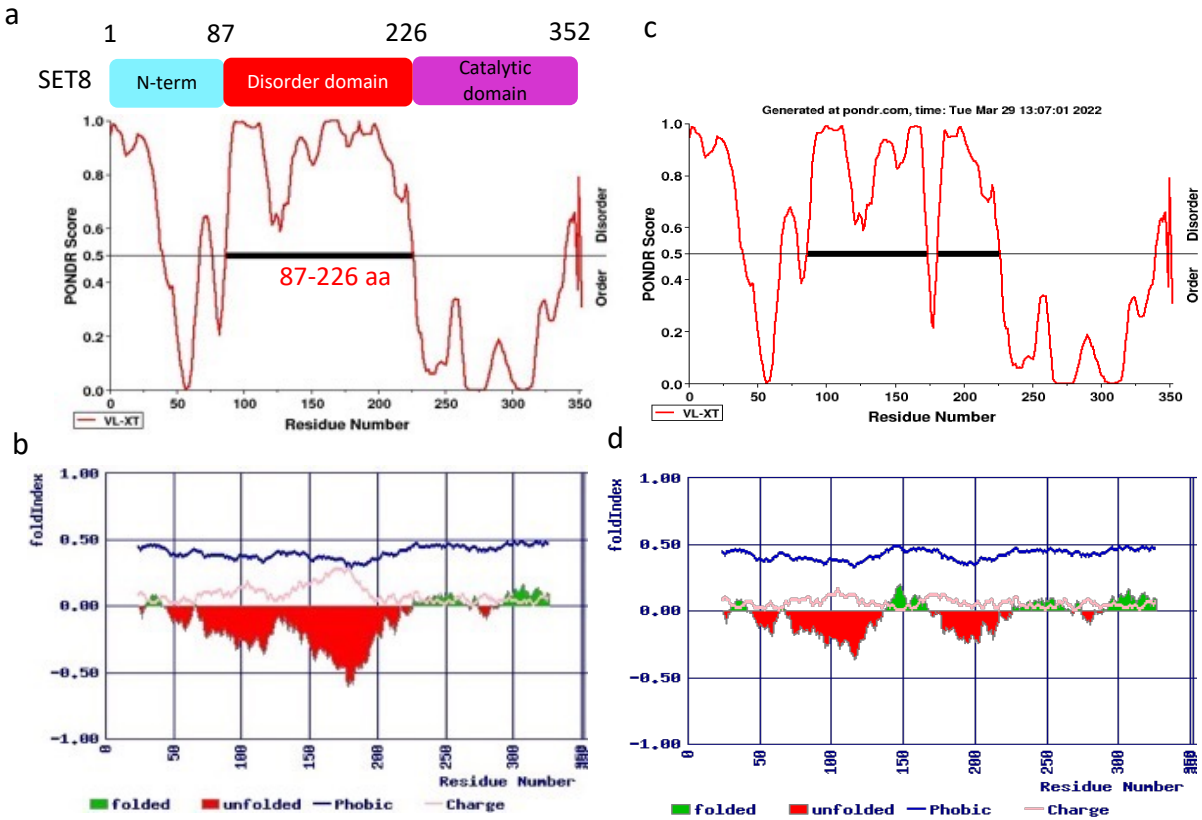

Supplementary Figure 8: Folding Profile of Wild Type SET8 and SET8 mutation. (a) & (c) Structural disordered prediction for SET8 (87-226 aa disordered region) & SET8 mutation using PONDR-VLXT. (b) & (d) Protein folding profiling using FoldIndex tool for SET8 & SET8 mutation (greens are folded and reds are unfolded).

Fig. S9

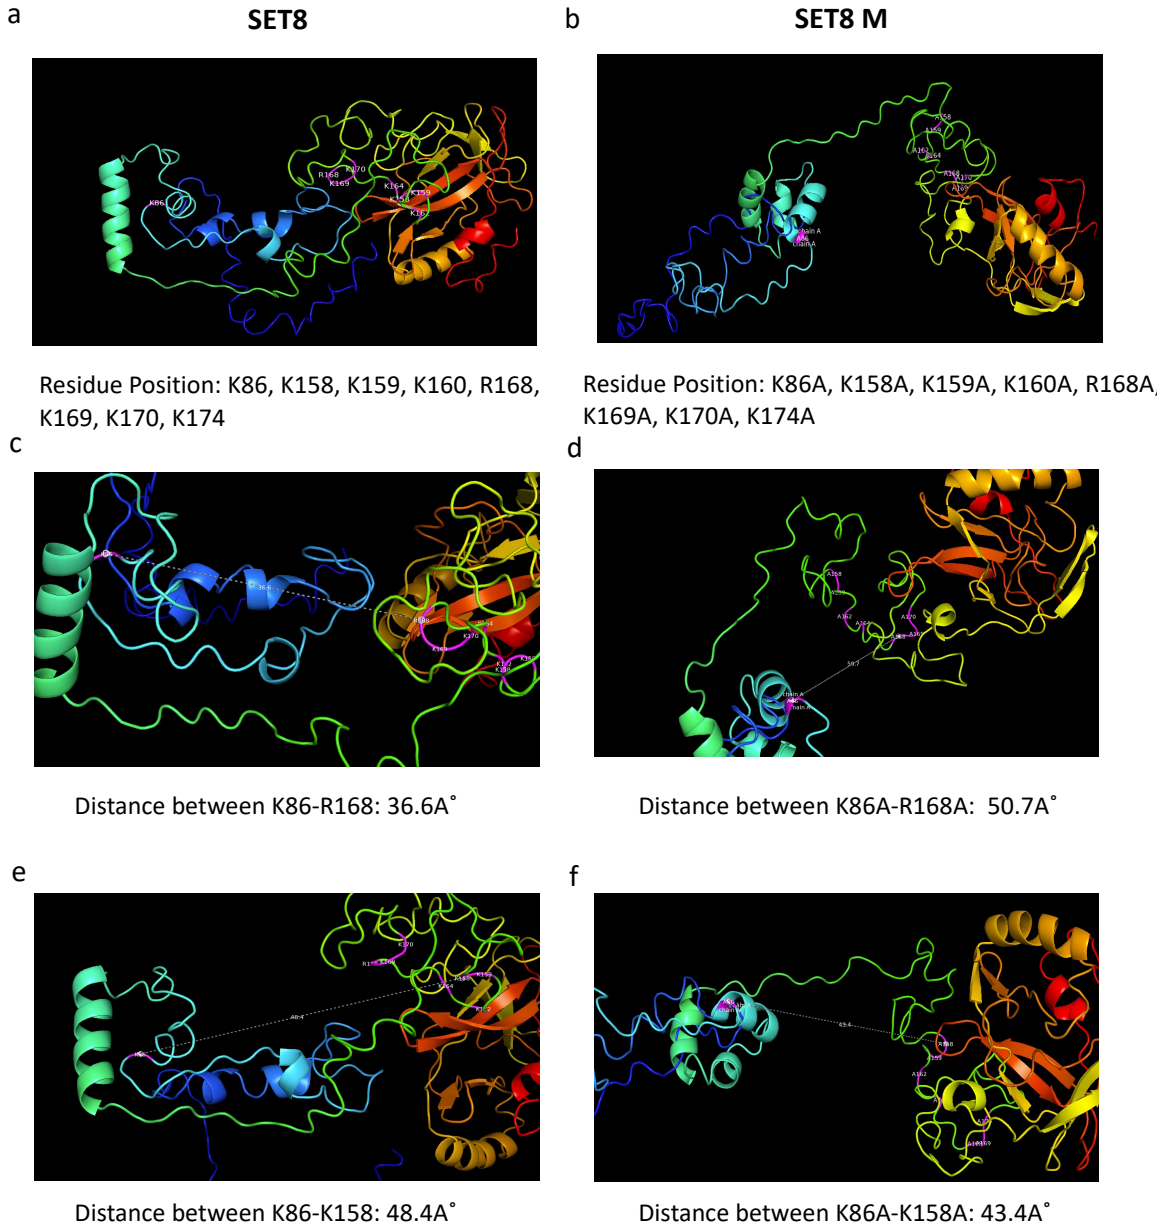

Supplementary Figure 9: PDB structures of SET8 and mutated SET8 generated from I-TASSER. (a) PDB structure of Wild Type SET8 protein where lysine enriched domains are marked in pink (K86, K158, K159, K160, K162, R168, K169, K170, K174). (b) PDB structure of Mutated SET8 protein where mutated alanine enriched domains are colored in pink. (c) Distance from K86-R168 = 36.6Å of wild type SET8. (d) Distance from K86A-R168A = 50.7Å of mutated SET8. (e) Distance from K86-K158 = 48.4Å of wild type SET8. (f) Distance from K86A-K158A = 43.4Å of mutated SET8.

Fig. S10

a

SET8

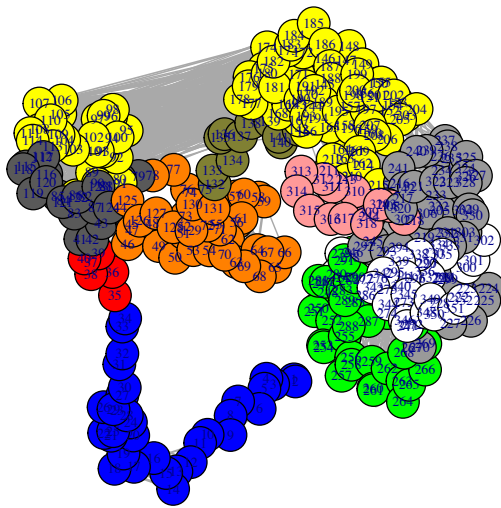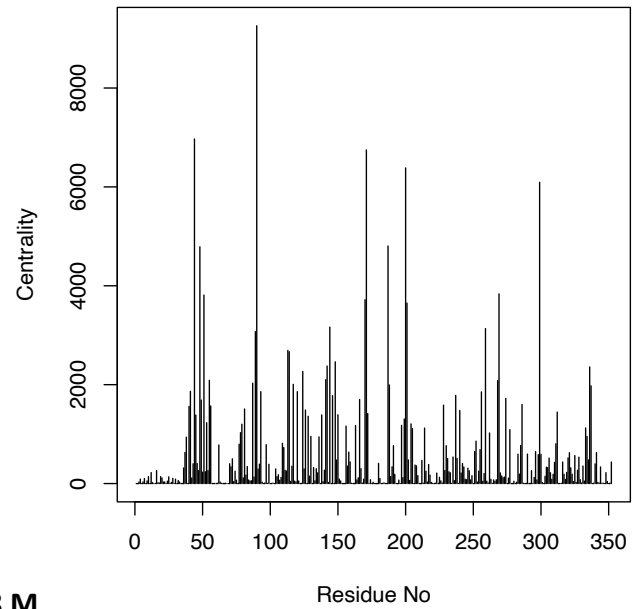

b

SET8 M

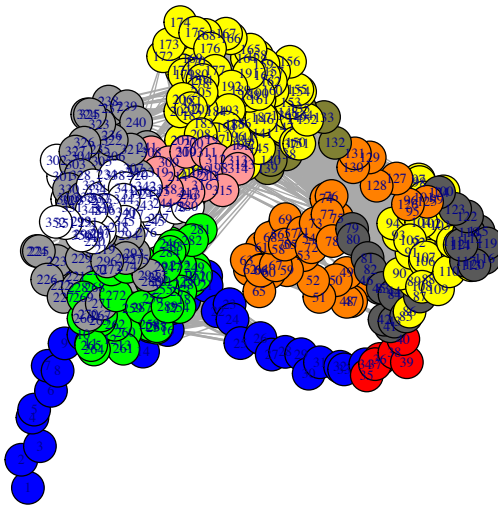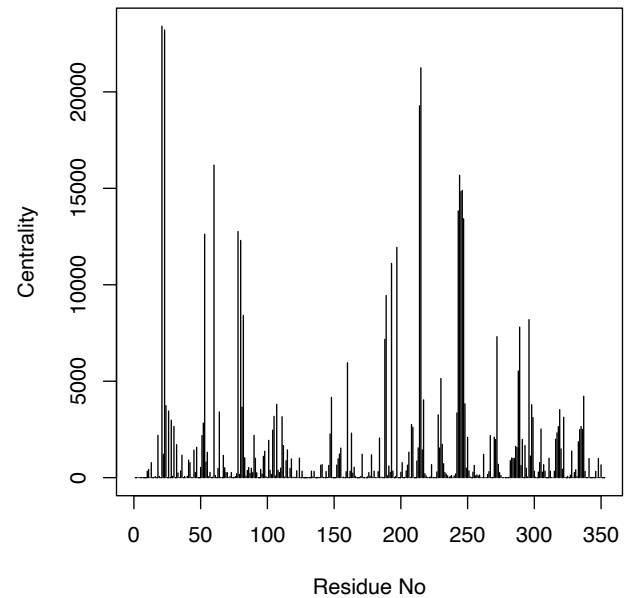

Supplementary Figure 10: Structure Network of the Monomeric Structure of the wildtype and mutated SET8. (a) Structure Network Model (top, right) and Betweenness Centrality Plotting (top, left) throughout residue space for wildtype SET8. (b) Structure Network Model (bottom, right) and Betweenness Centrality Plotting (bottom, left) throughout residue space for mutated SET8.

Fig. S11

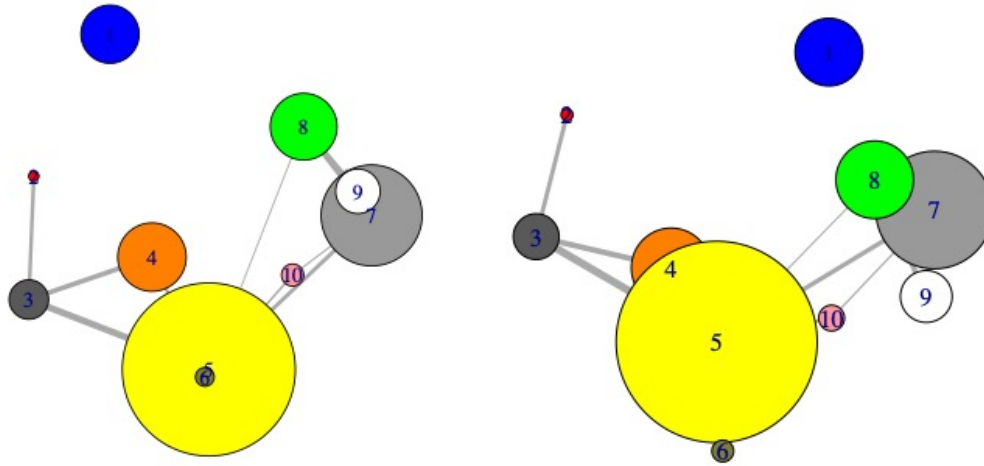

| No. of Clusters | No. of Members within Clusters | Residues                                    |
|-----------------|--------------------------------|---------------------------------------------|
| 1               | 34                             | 1:34                                        |
| 2               | 6                              | 35:40                                       |
| 3               | 23                             | 41:45, 79:85, 87, 115:124                   |
| 4               | 40                             | 46:78, 125:131                              |
| 5               | 101                            | 86, 88:114, 143:215                         |
| 6               | 11                             | 132:142                                     |
| 7               | 59                             | 216:245, 270:271, 292:299, 303:306, 320:334 |
| 8               | 39                             | 246:269, 272:275, 281:291                   |
| 9               | 26                             | 276:280, 300:302, 335:352                   |
| 10              | 13                             | 307:319                                     |

| No. of Clusters | No. of Members within Clusters | Residues                      |
|-----------------|--------------------------------|-------------------------------|
| 1               | 7                              | 1:7                           |
| 2               | 1                              | 8                             |
| 3               | 63                             | 9:22, 246:293, 295            |
| 4               | 42                             | 23:30, 46:79                  |
| 5               | 63                             | 31:45, 80:127                 |
| 6               | 1                              | 128                           |
| 7               | 3                              | 129:131                       |
| 8               | 29                             | 132:160                       |
| 9               | 54                             | 161:214                       |
| 10              | 62                             | 15:245, 294, 296:309, 319:334 |
| 11              | 9                              | 310:318                       |
| 12              | 18                             | 335:352                       |

Supplementary Figure 11. Cluster Network Models based on Betweenness Centrality Scoring where wild type SET8 has 10 modules (top, right), mutated SET8 has 12 modules (top, left). The residual members of each cluster are given in Tabular form for wild type SET8 (bottom, right) and mutated SET8 (bottom, left).

Fig. S12

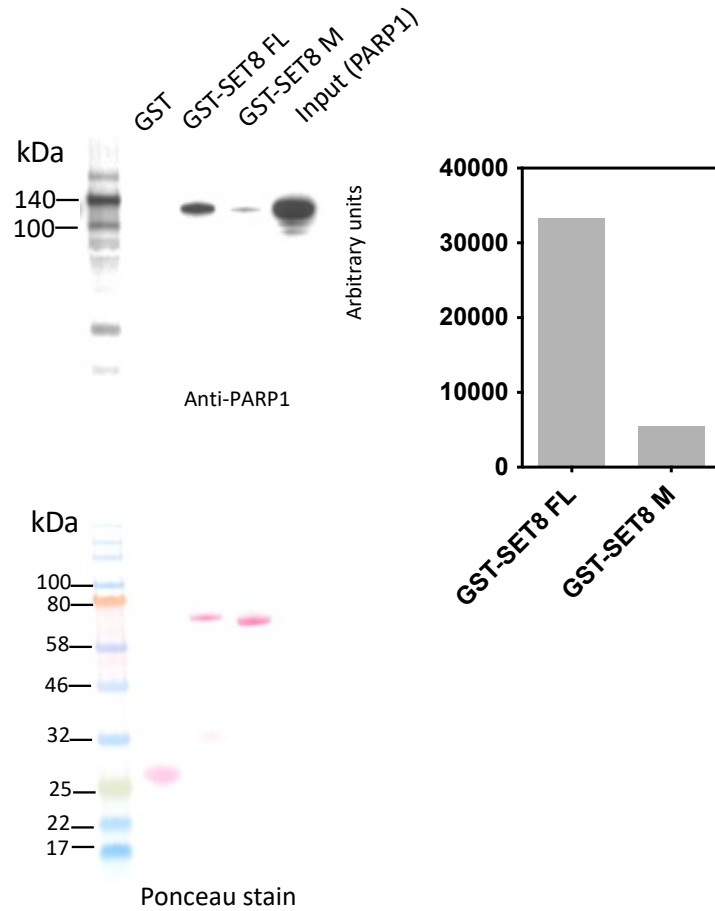

Supplementary Figure 12. SET8 Lysine mutation restrict PARP1 binding. GST pull down of GST-SET8FL or GST-SET8 M (K86A, K158/159A, K162/164A, R168A, K169/170A, K174A) of PARP1 full-length enzyme. Western blot probed with anti-PARP1 antibody (top, left), and the relative pulldown of PARP1 quantitated and shown in arbitrary unit (top, right) (n=2). Loading of the exact blot shown using ponceau staining (bottom).



Fig. S13

a

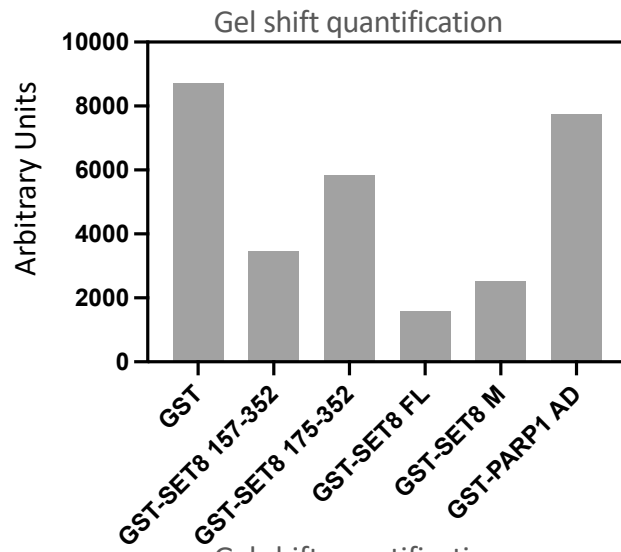

b

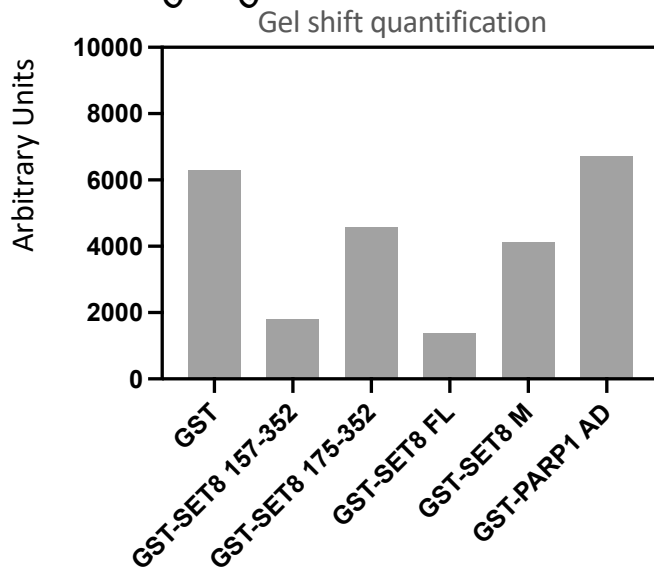

Supplementary Figure 13: Gel shift quantification of shifted DNA with GST-SET8 fusion fragments representing Figure 2a on top (a) (n=2) and Figure 2c at the bottom (b) (n=2).

Fig. S14

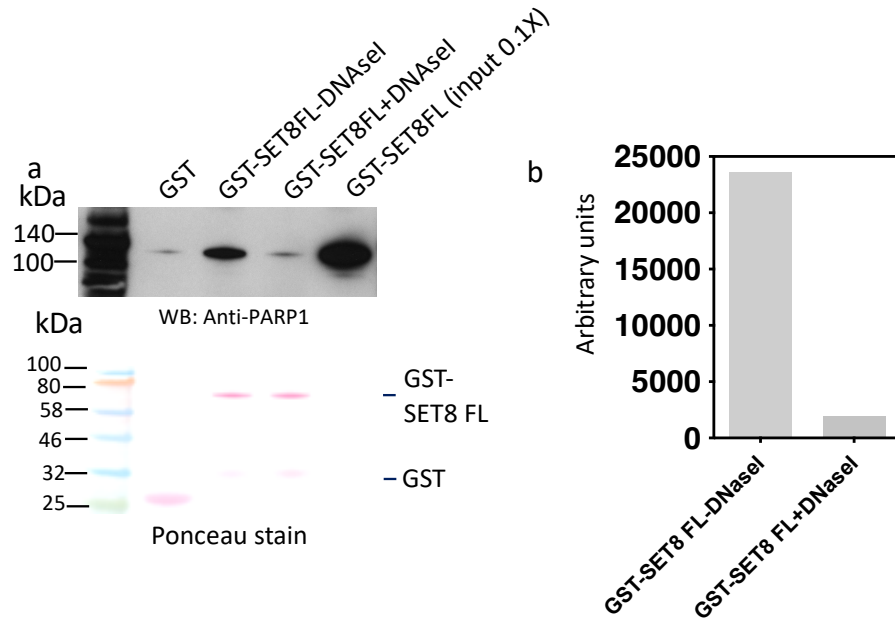

Supplementary Figure 14: DNA enhances SET8 and PARP1 binding. (a) GST pull down assay of GST-SET8 FL with PARP1 full length in the presence or absence of DNase I. Western blot using anti-PARP1 antibody reveals the presence of PARP1 (top, left side). (b) The relative pull-down of PARP1 quantitated and shown in arbitrary unit (right side) (n=2). Loading of the exact blot shown using ponceau staining (bottom, left side).

Fig. S15

a

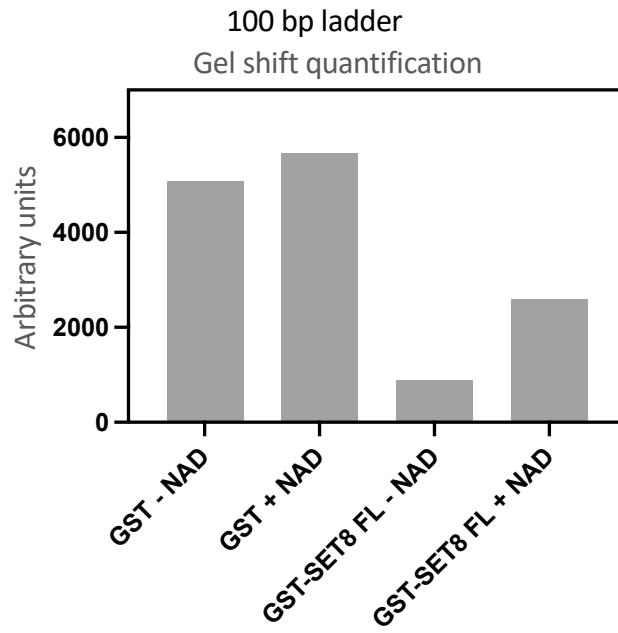

b

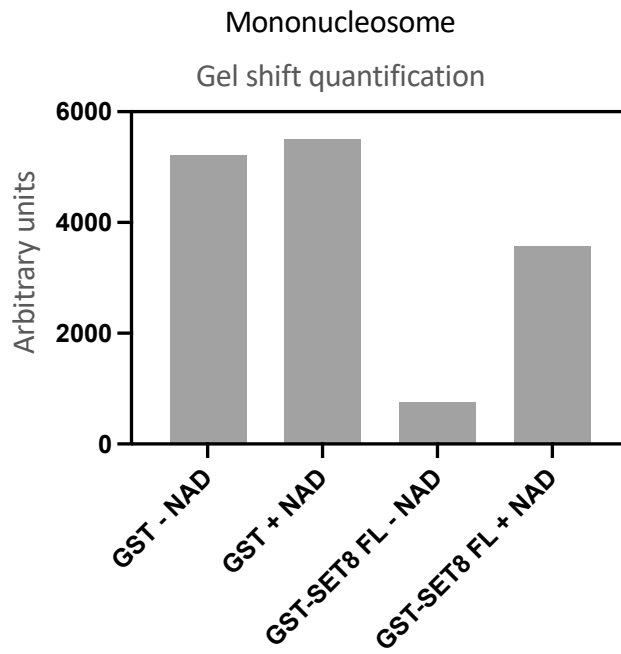

Supplementary Figure 15: Gel shift quantification of shifted DNA with GST-SET8 fusion fragments representing Figure 2d left lanes 2-5 with 100 bp DNA ladder on top (a) (n=2) and right lanes 7-10 at the bottom (b) (n=2).

Fig. S16

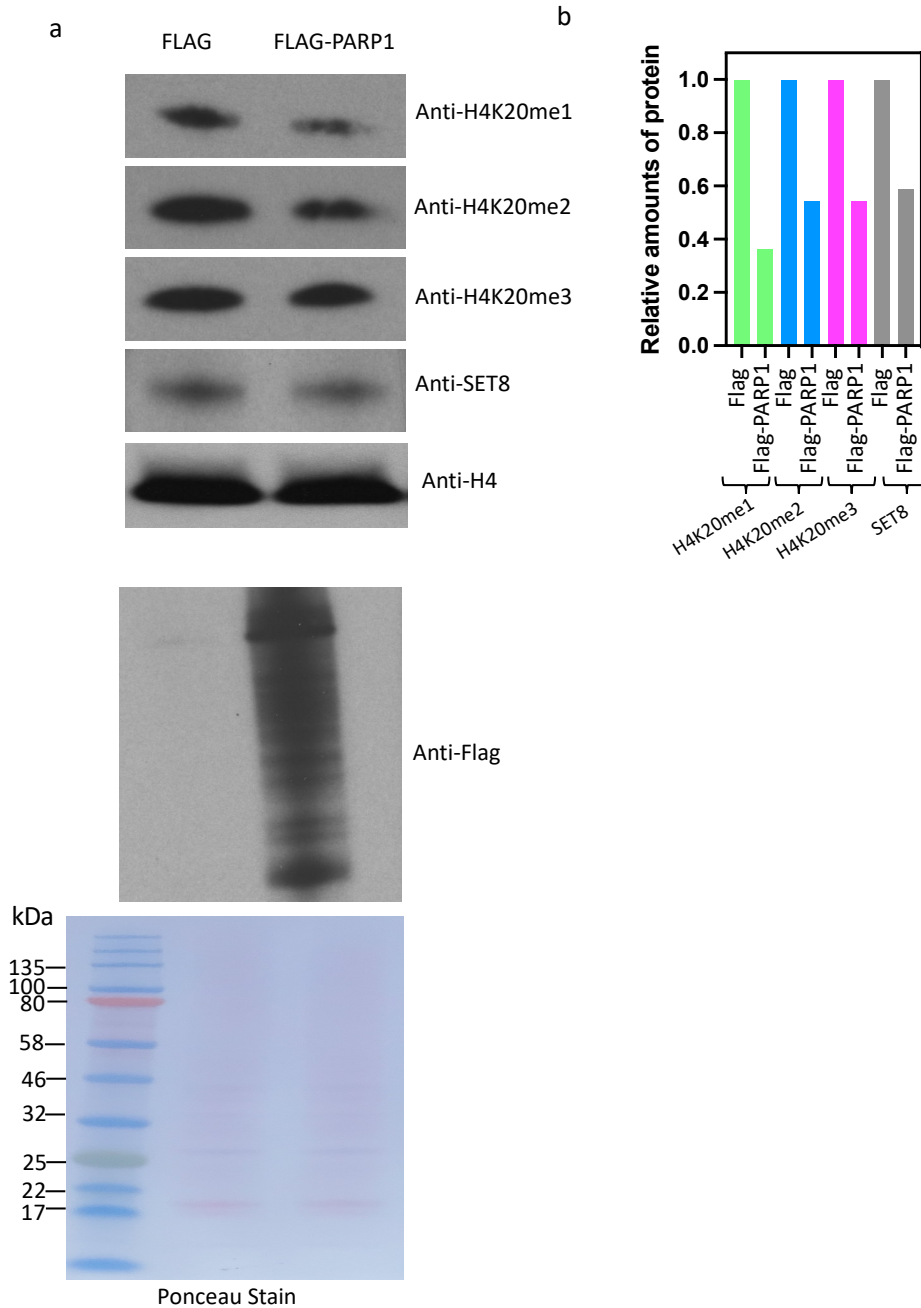

Supplementary Figure 16: PARP1 overexpression leads to change the cellular levels of H4K20 methylation. (a) Equal amounts of cell extract from cells transfected with FLAG or FLAG-PARP1, blotted and probed with antibodies as indicated. Anti-Flag antibody demonstrate auto-parylation of FLAG-PARP1. Equal loading is shown by ponceau staining. (b) Western blot showing levels of mono, di, tri methylation of H4K20, histone H4 and SET8 (n=2). Relative amounts of protein are measured by scanning three independent blots

Fig. S17

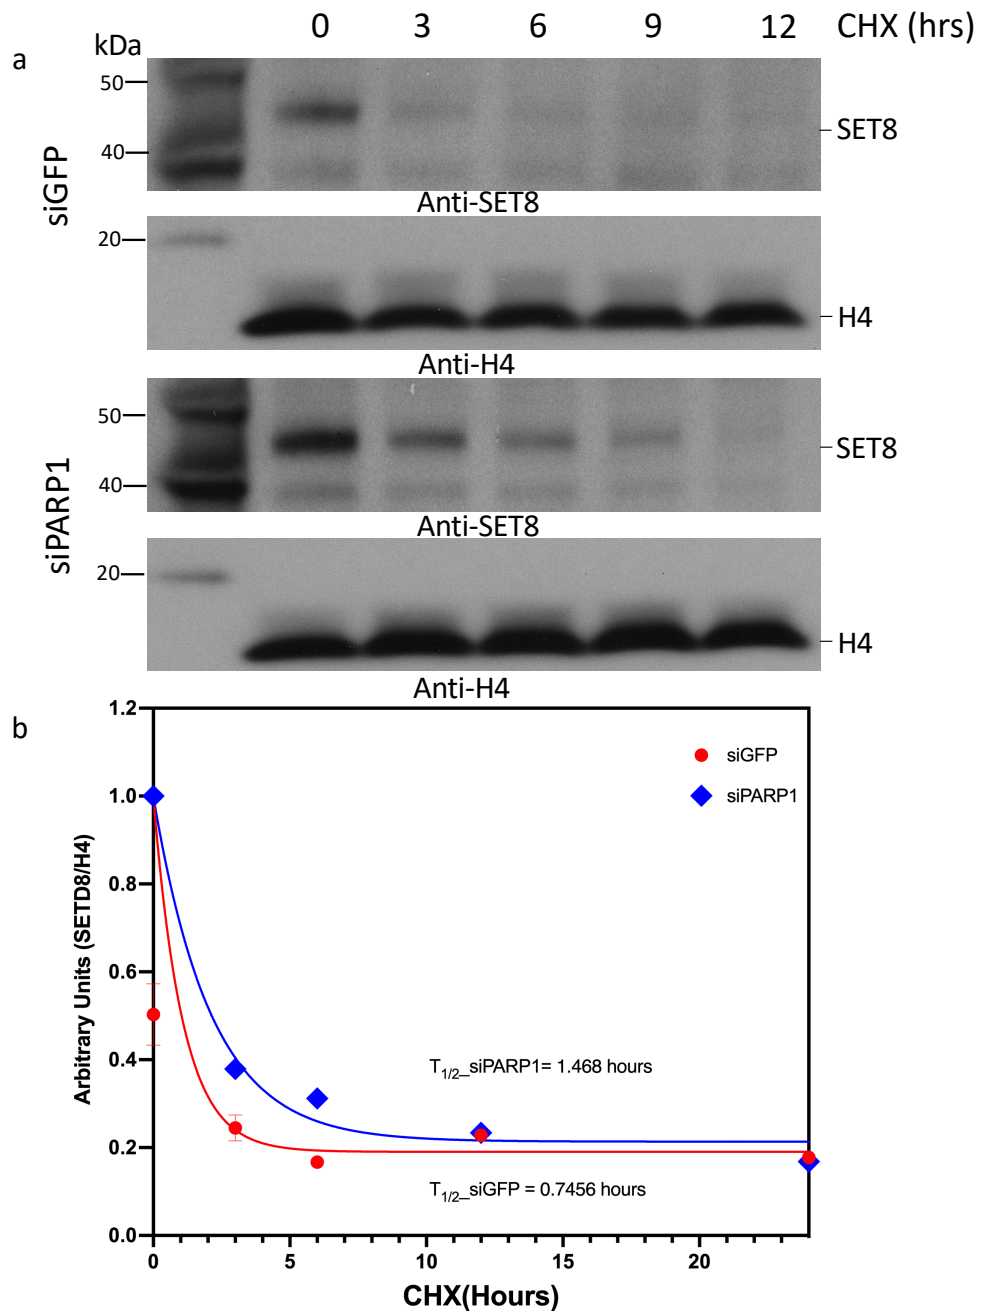

Supplementary Figure 17: Half-life of endogenous SET8 in PARP1 depleted cells. (a) siGFP (control) or siPARP1 was used for knockdown in Hela cells. Hrs of cycloheximide (CHX) is indicated. SET8 and H4 are revealed by western blot using specific antibodies. (b) In the lower panel amount of SET8 per lane is normalized with histone H4 and plotted. Data from two biological experiments are used.

Fig. S18

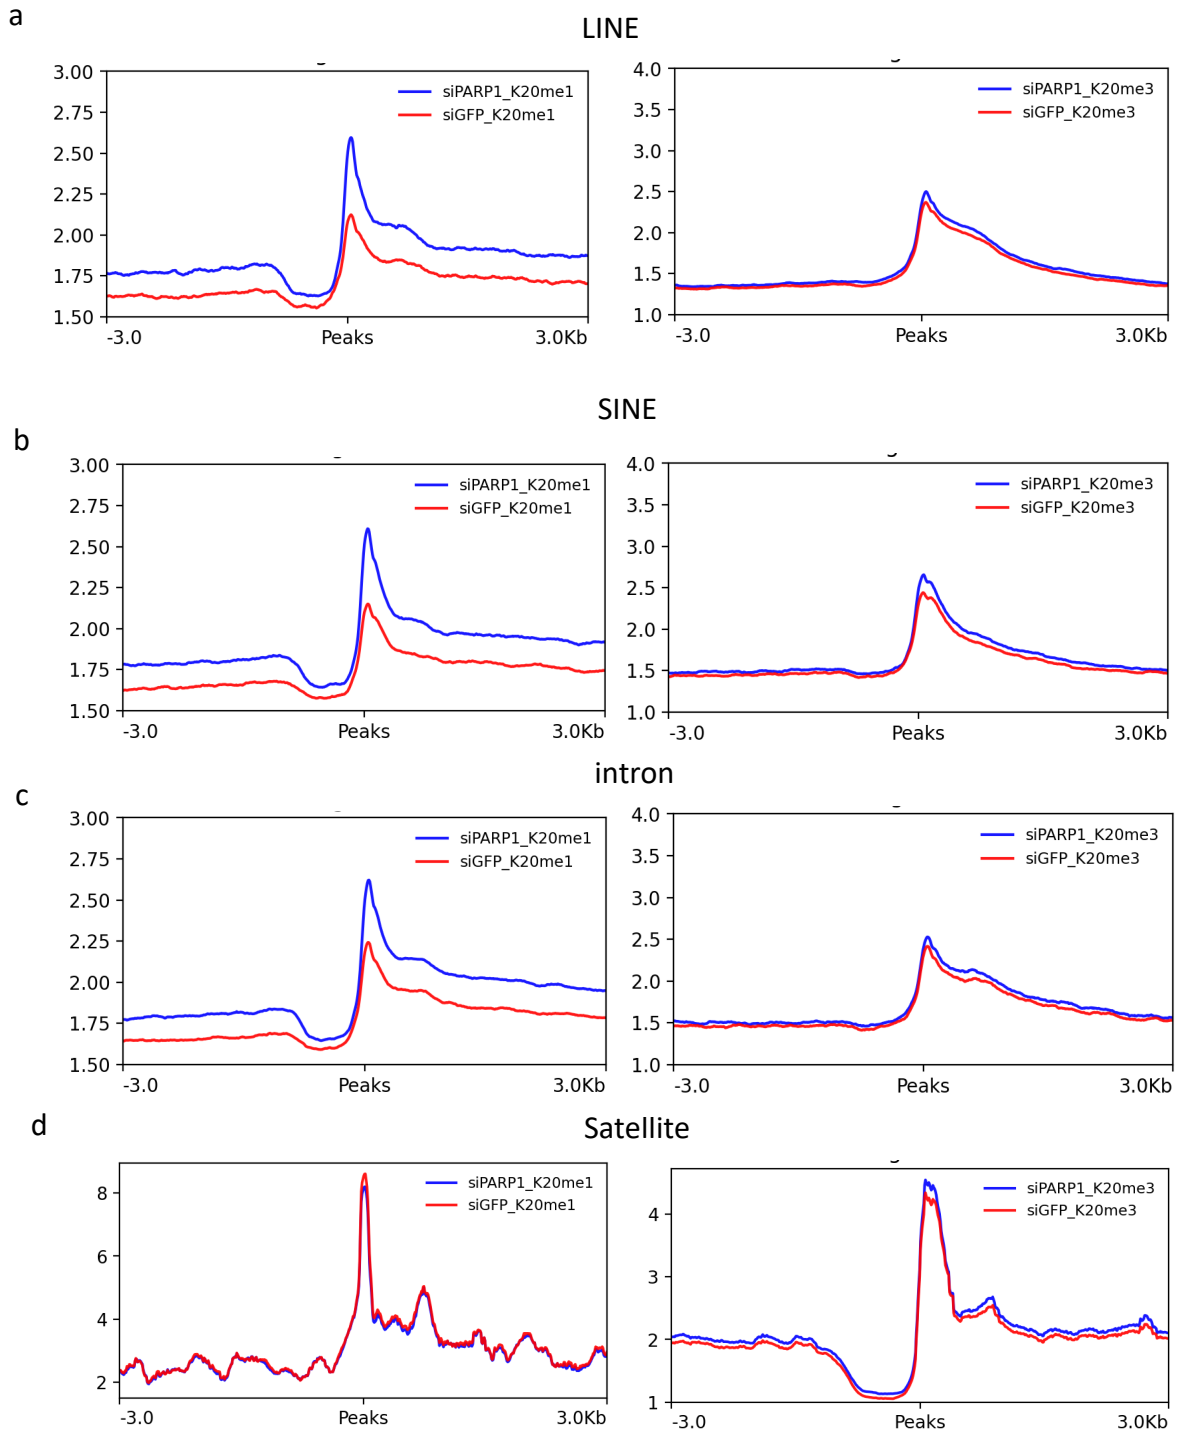

Supplementary Figure 18: Enrichment Profiling for H4K20me1 (right) and H4K20me3 (left) for PARP1 Knockdown and Control Conditions for different Peak Annotating genomic Regions. (a) LINE, (b) SINE, (c) Intron, and (d) Satellite.

Fig. S19

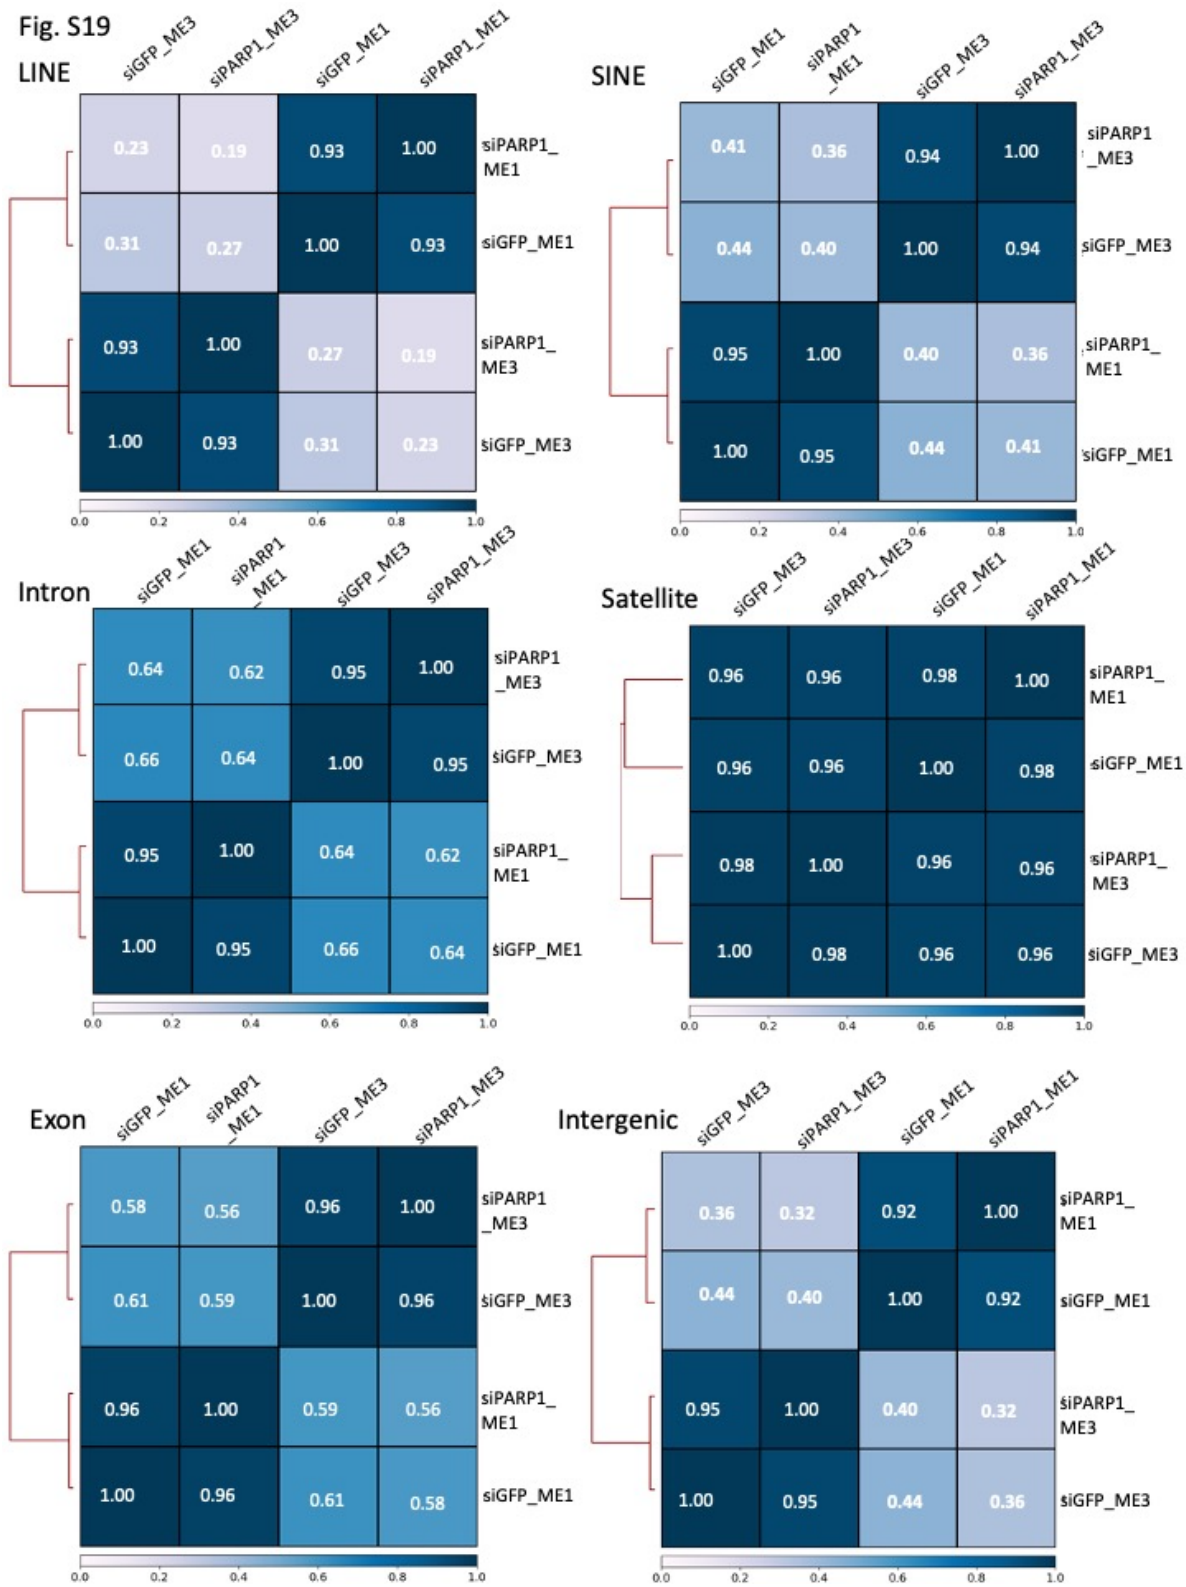

Supplementary Figure 19: Spearman Correlation Heatmaps of PARP1 Knockdown and Control Conditions for different Peak Annotating Regions of H4K20me1 and H4K20me3 i.e., LINE, SINE, Intron, Satellite, Exon, and Intergenic.

Fig. S20

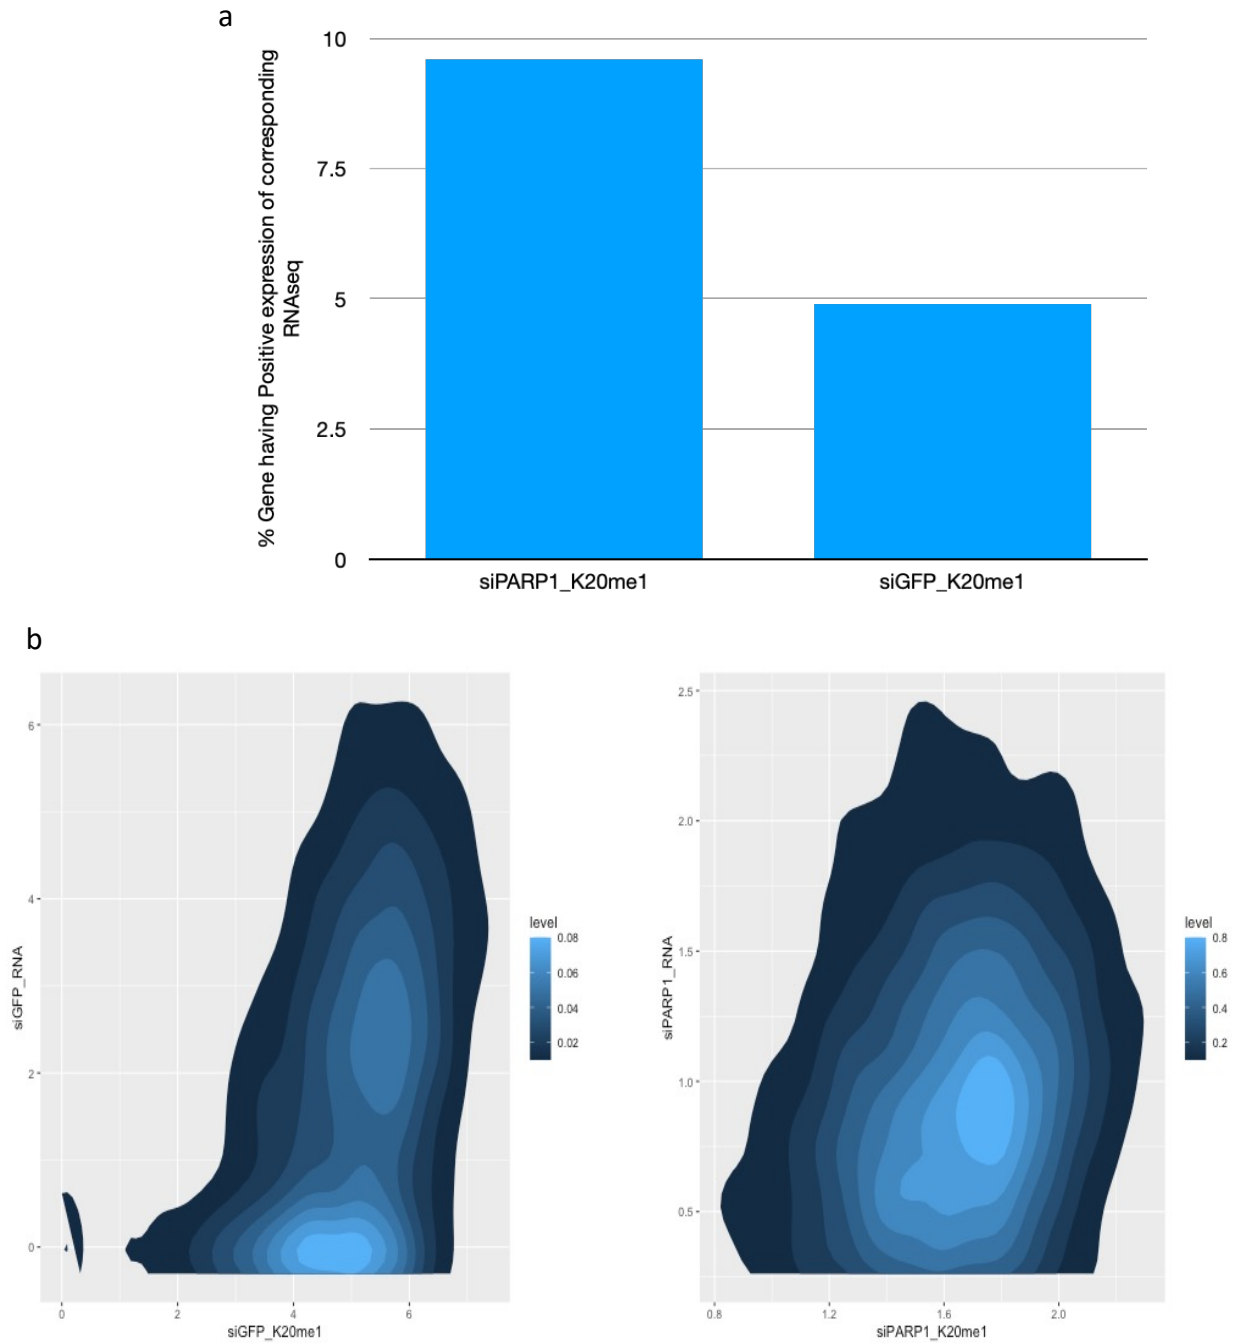

Supplementary Figure 20: Comparative study between RNA seq and CHIP seq from PARP1 Knockdown and Control Conditions. (a) Overlapping genes between intragenic regions from different conditions and corresponding Positive Expression from RNA seq. (b) Density plot Profiling to show the distribution of the expression between siGFP\_H4K20me1 positive gene expression and corresponding RNA seq genomic expression profiling (top, left) and, between siPARP1\_H4K20me1 positive gene expression and corresponding RNA seq genomic expression profiling (top, right).



Fig. S21

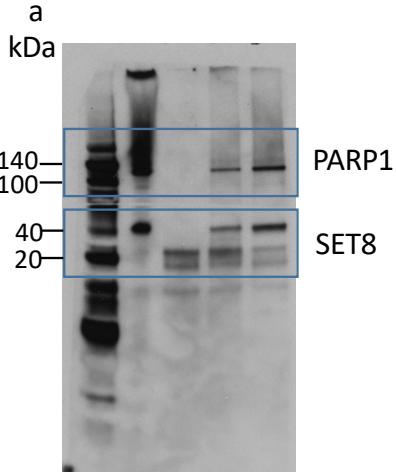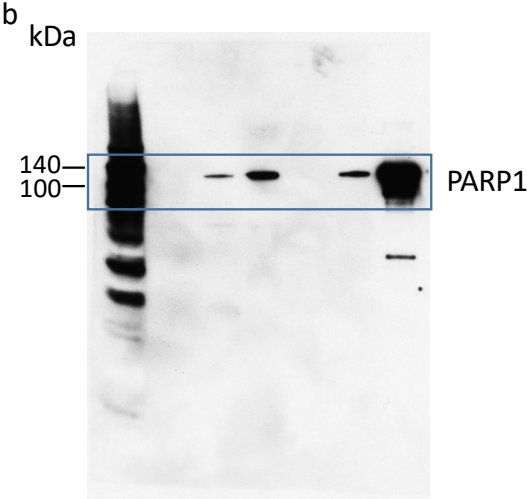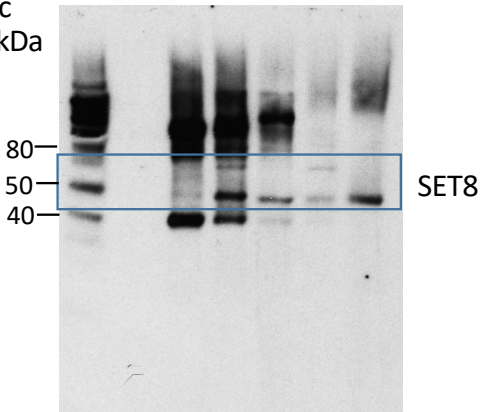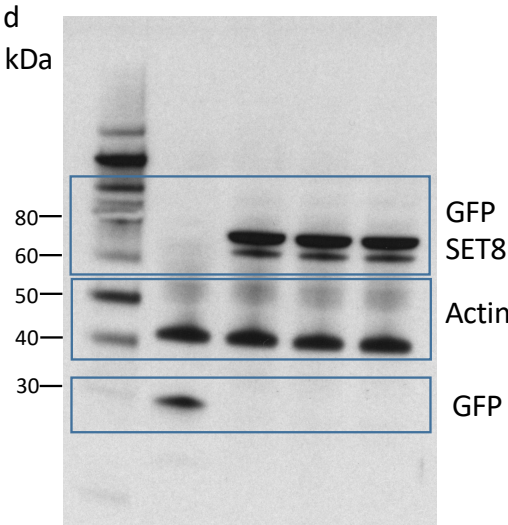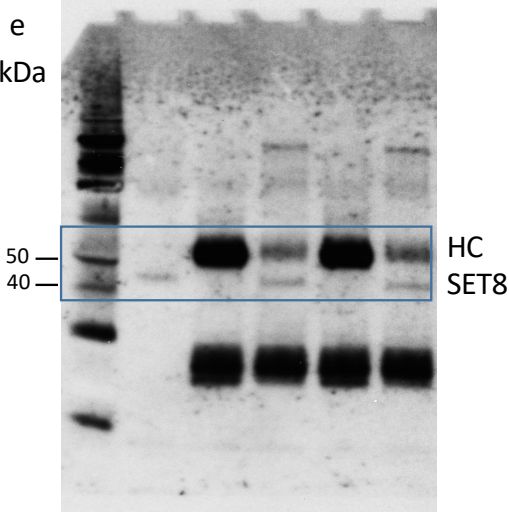

Fig. S21

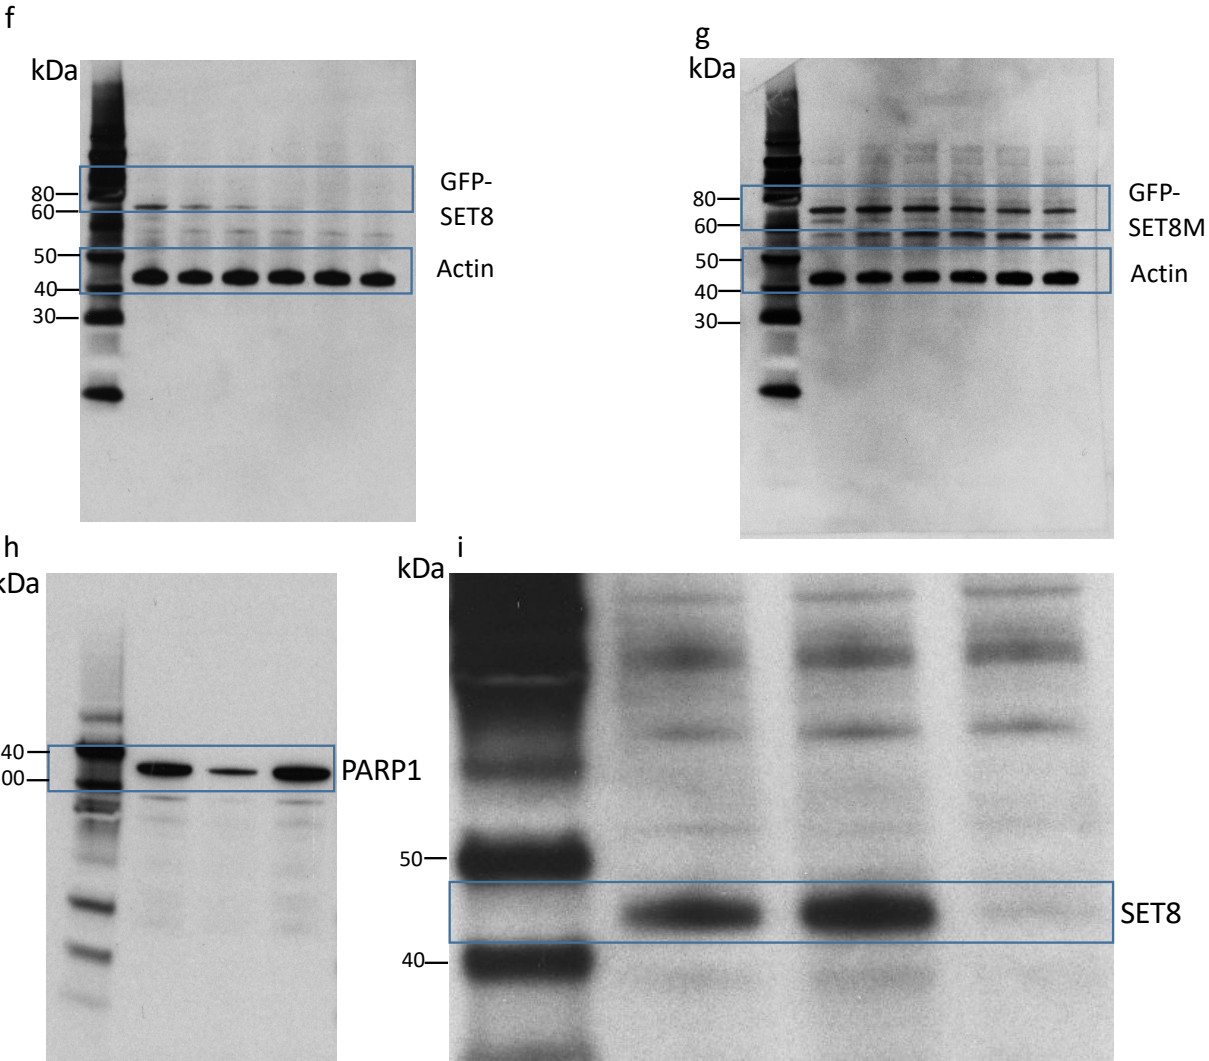

Supplementary Figure 21: Uncropped western blots correspond to Figure 1a,1c-d (a-c) and Figure 3b-c (d-e); Figure 4b (f-g) and Figure 4c (h-i)

| Supplementary Table 1: Proteomic analysis of SET8 pull-down in HEK293T cells using LC-MS. |        |              |           |         |           |                                                                                                |  |
|-------------------------------------------------------------------------------------------|--------|--------------|-----------|---------|-----------|------------------------------------------------------------------------------------------------|--|
| Accession                                                                                 | -10lgP | Coverage (%) | #Peptides | #Unique | Avg. Mass | Description                                                                                    |  |
| P09874 PARP1_HUMAN                                                                        | 191.03 | 30           | 36        | 36      | 113084    | Poly [ADP-ribose] polymerase 1 OS=Homo sapiens GN=PARP1 PE=1 SV=4                              |  |
| Q9NQR1-2 SETD8_HUMAN                                                                      | 179.9  | 53           | 29        | 29      | 39223     | Isoform 2 of N-lysine methyltransferase SETD8 OS=Homo sapiens GN=SETD8                         |  |
| P07437 TBB5_HUMAN                                                                         | 170.53 | 51           | 36        | 35      | 49671     | Tubulin beta chain OS=Homo sapiens GN=TUBB PE=1 SV=2                                           |  |
| P68363 TBA1B_HUMAN                                                                        | 158.69 | 49           | 37        | 36      | 50152     | Tubulin alpha-1B chain OS=Homo sapiens GN=TUBA1B PE=1 SV=1                                     |  |
| Q00839-2 HNRPU_HUMAN                                                                      | 156.78 | 26           | 27        | 27      | 88980     | Isoform Short of Heterogeneous nuclear ribonucleoprotein U OS=Homo sapiens GN=HNRNPU           |  |
| P11498 PYC_HUMAN                                                                          | 150.73 | 21           | 30        | 29      | 129634    | Pyruvate carboxylase mitochondrial OS=Homo sapiens GN=PC PE=1 SV=2                             |  |
| P08107 HSP71_HUMAN                                                                        | 149.74 | 31           | 26        | 11      | 70052     | Heat shock 70 kDa protein 1A/1B OS=Homo sapiens GN=HSPA1A PE=1 SV=5                            |  |
| P08238 HS90B_HUMAN                                                                        | 147.66 | 18           | 13        | 8       | 83264     | Heat shock protein HSP 90-beta OS=Homo sapiens GN=HSP90AB1 PE=1 SV=4                           |  |
| P13639 EF2_HUMAN                                                                          | 147.49 | 20           | 22        | 22      | 95338     | Elongation factor 2 OS=Homo sapiens GN=EEF2 PE=1 SV=4                                          |  |
| P11142 HSP7C_HUMAN                                                                        | 141.56 | 27           | 25        | 11      | 70898     | Heat shock cognate 71 kDa protein OS=Homo sapiens GN=HSPA8 PE=1 SV=1                           |  |
| Q13263 TIF1B_HUMAN                                                                        | 136.65 | 17           | 15        | 15      | 88550     | Transcription intermediary factor 1-beta OS=Homo sapiens GN=TRIM28 PE=1 SV=5                   |  |
| P61978-2 HNRPK_HUMAN                                                                      | 131.92 | 35           | 20        | 20      | 51028     | Isoform 2 of Heterogeneous nuclear ribonucleoprotein K OS=Homo sapiens GN=HNRNPK               |  |
| P31943 HNRH1_HUMAN                                                                        | 130.44 | 25           | 16        | 7       | 49229     | Heterogeneous nuclear ribonucleoprotein H OS=Homo sapiens GN=HNRNPH1 PE=1 SV=4                 |  |
| P14866 HNRPL_HUMAN                                                                        | 125.33 | 30           | 14        | 14      | 64133     | Heterogeneous nuclear ribonucleoprotein L OS=Homo sapiens GN=HNRNPL PE=1 SV=2                  |  |
| P19338 NUCL_HUMAN                                                                         | 123.56 | 21           | 16        | 16      | 76615     | Nucleolin OS=Homo sapiens GN=NCL PE=1 SV=3                                                     |  |
| Q96RQ3 MCCA_HUMAN                                                                         | 122.47 | 14           | 9         | 9       | 80473     | Methylcrotonoyl-CoA carboxylase subunit alpha mitochondrial OS=Homo sapiens GN=MCCC1 PE=1 SV=3 |  |
| Q92841 DDX17_HUMAN                                                                        | 121.95 | 17           | 13        | 12      | 80273     | Probable ATP-dependent RNA helicase DDX17 OS=Homo sapiens GN=DDX17 PE=1 SV=2                   |  |
| Q09028-4 RBBP4_HUMAN                                                                      | 121.94 | 32           | 10        | 7       | 43482     | Isoform 4 of Histone-binding protein RBBP4 OS=Homo sapiens GN=RBBP4                            |  |
| P07900 HS90A_HUMAN                                                                        | 115.99 | 7            | 7         | 3       | 84660     | Heat shock protein HSP 90-alpha OS=Homo sapiens GN=HSP90AA1 PE=1 SV=5                          |  |
| P05166 PCCB_HUMAN                                                                         | 115.83 | 17           | 11        | 11      | 58216     | Propionyl-CoA carboxylase beta chain mitochondrial OS=Homo sapiens GN=PCCB PE=1 SV=3           |  |
| P60709 ACTB_HUMAN                                                                         | 115.26 | 17           | 9         | 9       | 41737     | Actin cytoplasmic 1 OS=Homo sapiens GN=ACTB PE=1 SV=1                                          |  |
| P55795 HNRH2_HUMAN                                                                        | 112.89 | 14           | 9         | 1       | 49264     | Heterogeneous nuclear ribonucleoprotein H2 OS=Homo sapiens GN=HNRNPH2 PE=1 SV=1                |  |
| Q12906-5 ILF3_HUMAN                                                                       | 109.29 | 7            | 6         | 6       | 74607     | Isoform 5 of Interleukin enhancer-binding factor 3 OS=Homo sapiens GN=ILF3                     |  |
| P68104-2 EF1A1_HUMAN                                                                      | 107.81 | 24           | 13        | 13      | 47869     | Isoform 2 of Elongation factor 1-alpha 1 OS=Homo sapiens GN=EEF1A1                             |  |
| P52272 HNRPM_HUMAN                                                                        | 106.13 | 14           | 11        | 11      | 77516     | Heterogeneous nuclear ribonucleoprotein M OS=Homo sapiens GN=HNRNPM PE=1 SV=3                  |  |
| P10809 CH60_HUMAN                                                                         | 105.64 | 11           | 6         | 6       | 61055     | 60 kDa heat shock protein mitochondrial OS=Homo sapiens GN=HSPD1 PE=1 SV=2                     |  |
| Q9HCC0 MCCB_HUMAN                                                                         | 101.46 | 12           | 9         | 9       | 61333     | Methylcrotonoyl-CoA carboxylase beta chain mitochondrial OS=Homo sapiens GN=MCCC2 PE=1 SV=1    |  |
| P11387 TOP1_HUMAN                                                                         | 100.61 | 11           | 6         | 6       | 90726     | DNA topoisomerase 1 OS=Homo sapiens GN=TOP1 PE=1 SV=2                                          |  |
| Q13838 DX39B_HUMAN                                                                        | 98.93  | 14           | 8         | 8       | 48991     | Spliceosome RNA helicase DDX39B OS=Homo sapiens GN=DDX39B PE=1 SV=1                            |  |
| P08670 VIME_HUMAN                                                                         | 98.32  | 18           | 10        | 9       | 53652     | Vimentin OS=Homo sapiens GN=VIM PE=1 SV=4                                                      |  |
| P23246-2 SFPO_HUMAN                                                                       | 97.17  | 14           | 7         | 7       | 72263     | Isoform Short of Splicing factor proline- and glutamine-rich OS=Homo sapiens GN=SFPO           |  |
| P12956 XRCC6_HUMAN                                                                        | 94.61  | 12           | 7         | 7       | 69843     | X-ray repair cross-complementing protein 6 OS=Homo sapiens GN=XRCC6 PE=1 SV=2                  |  |
| P06733 ENOA_HUMAN                                                                         | 93.15  | 19           | 9         | 8       | 47169     | Alpha-enolase OS=Homo sapiens GN=ENO1 PE=1 SV=2                                                |  |
| P05165 PCCA_HUMAN                                                                         | 92.96  | 12           | 8         | 7       | 80059     | Propionyl-CoA carboxylase alpha chain mitochondrial OS=Homo sapiens GN=PCCA PE=1 SV=4          |  |
| P26368-2 U2AF2_HUMAN                                                                      | 92.22  | 17           | 6         | 6       | 53121     | Isoform 2 of Splicing factor U2AF 65 kDa subunit OS=Homo sapiens GN=U2AF2                      |  |

|                      |       |    |   |   |        |                                                                                              |
|----------------------|-------|----|---|---|--------|----------------------------------------------------------------------------------------------|
| Q9UMS4 PRP19_HUMAN   | 91.03 | 15 | 7 | 7 | 55181  | Pre-mRNA-processing factor 19 OS=Homo sapiens GN=PRPF19 PE=1 SV=1                            |
| P26599 PTBP1_HUMAN   | 89.88 | 15 | 7 | 7 | 57221  | Polypyrimidine tract-binding protein 1 OS=Homo sapiens GN=PTBP1 PE=1 SV=1                    |
| Q8NC51-4 PAIRB_HUMAN | 89.65 | 21 | 6 | 6 | 42427  | Isoform 4 of Plasminogen activator inhibitor 1 RNA-binding protein OS=Homo sapiens GN=SERBP1 |
| P55209-2 NP1L1_HUMAN | 88.54 | 11 | 5 | 4 | 42762  | Isoform 2 of Nucleosome assembly protein 1-like 1 OS=Homo sapiens GN=NAP1L1                  |
| P36578 RL4_HUMAN     | 88.28 | 23 | 8 | 8 | 47697  | 60S ribosomal protein L4 OS=Homo sapiens GN=RPL4 PE=1 SV=5                                   |
| P35637-2 FUS_HUMAN   | 86.59 | 9  | 5 | 5 | 53355  | Isoform Short of RNA-binding protein FUS OS=Homo sapiens GN=FUS                              |
| P13010 XRCC5_HUMAN   | 86.05 | 8  | 6 | 6 | 82705  | X-ray repair cross-complementing protein 5 OS=Homo sapiens GN=XRCC5 PE=1 SV=3                |
| O75475 PSIP1_HUMAN   | 83.81 | 12 | 5 | 5 | 60103  | PC4 and SFRS1-interacting protein OS=Homo sapiens GN=PSIP1 PE=1 SV=1                         |
| O43390-3 HNRPR_HUMAN | 83.26 | 13 | 7 | 7 | 66980  | Isoform 3 of Heterogeneous nuclear ribonucleoprotein R OS=Homo sapiens GN=HNRNPR             |
| Q16576-2 RBBP7_HUMAN | 82.04 | 12 | 4 | 2 | 52314  | Isoform 2 of Histone-binding protein RBBP7 OS=Homo sapiens GN=RBBP7                          |
| P67809 YBOX1_HUMAN   | 78.03 | 13 | 3 | 3 | 35924  | Nuclease-sensitive element-binding protein 1 OS=Homo sapiens GN=YBX1 PE=1 SV=3               |
| P39023 RL3_HUMAN     | 77.63 | 14 | 5 | 5 | 46109  | 60S ribosomal protein L3 OS=Homo sapiens GN=RPL3 PE=1 SV=2                                   |
| P38646 GRP75_HUMAN   | 77.62 | 10 | 7 | 4 | 73681  | Stress-70 protein mitochondrial OS=Homo sapiens GN=HSPA9 PE=1 SV=2                           |
| P52597 HNRPF_HUMAN   | 75.88 | 12 | 5 | 2 | 45672  | Heterogeneous nuclear ribonucleoprotein F OS=Homo sapiens GN=HNRNPF PE=1 SV=3                |
| P14618-2 KPYM_HUMAN  | 73.4  | 9  | 5 | 5 | 58062  | Isoform M1 of Pyruvate kinase PKM OS=Homo sapiens GN=PKM                                     |
| P09651-3 ROA1_HUMAN  | 70.09 | 10 | 4 | 2 | 29386  | Isoform 2 of Heterogeneous nuclear ribonucleoprotein A1 OS=Homo sapiens GN=HNRNPA1           |
| Q92945 FUBP2_HUMAN   | 68.99 | 6  | 5 | 4 | 73115  | Far upstream element-binding protein 2 OS=Homo sapiens GN=KHSRP PE=1 SV=4                    |
| P78371 TCPB_HUMAN    | 67    | 6  | 3 | 3 | 57488  | T-complex protein 1 subunit beta OS=Homo sapiens GN=CCT2 PE=1 SV=4                           |
| Q9BSJ8 ESYT1_HUMAN   | 66.27 | 3  | 3 | 3 | 122856 | Extended synaptotagmin-1 OS=Homo sapiens GN=ESYT1 PE=1 SV=1                                  |
| Q15233-2 NONO_HUMAN  | 65.65 | 7  | 2 | 2 | 43866  | Isoform 2 of Non-POU domain-containing octamer-binding protein OS=Homo sapiens GN=NONO       |
| Q9Y230 RUVB2_HUMAN   | 65.19 | 8  | 4 | 4 | 51157  | RuvB-like 2 OS=Homo sapiens GN=RUVBL2 PE=1 SV=3                                              |
| Q99832-3 TCPH_HUMAN  | 64.64 | 5  | 3 | 3 | 54804  | Isoform 3 of T-complex protein 1 subunit eta OS=Homo sapiens GN=CCT7                         |
| P55060-4 XPO2_HUMAN  | 64.23 | 2  | 2 | 2 | 103879 | Isoform 4 of Exportin-2 OS=Homo sapiens GN=CSE1L                                             |
| Q9Y265-2 RUVB1_HUMAN | 64.06 | 10 | 4 | 4 | 42127  | Isoform 2 of RuvB-like 1 OS=Homo sapiens GN=RUVBL1                                           |
| P25205 MCM3_HUMAN    | 63.14 | 5  | 3 | 3 | 90981  | DNA replication licensing factor MCM3 OS=Homo sapiens GN=MCM3 PE=1 SV=3                      |
| P43243 MATR3_HUMAN   | 60.57 | 4  | 2 | 2 | 94623  | Matrin-3 OS=Homo sapiens GN=MATR3 PE=1 SV=2                                                  |
| P11586 C1TC_HUMAN    | 60.29 | 4  | 3 | 3 | 101559 | C-1-tetrahydrofolate synthase cytoplasmic OS=Homo sapiens GN=MTHFD1 PE=1 SV=3                |
| P11021 GRP78_HUMAN   | 59.23 | 6  | 5 | 1 | 72333  | 78 kDa glucose-regulated protein OS=Homo sapiens GN=HSPA5 PE=1 SV=2                          |
| P22626-2 ROA2_HUMAN  | 59.04 | 7  | 3 | 1 | 36006  | Isoform A2 of Heterogeneous nuclear ribonucleoproteins A2/B1 OS=Homo sapiens GN=HNRNPA2B1    |
| P49368-2 TCPG_HUMAN  | 58.22 | 7  | 3 | 3 | 56431  | Isoform 2 of T-complex protein 1 subunit gamma OS=Homo sapiens GN=CCT3                       |
| P25705-2 ATPA_HUMAN  | 58.09 | 5  | 2 | 2 | 54494  | Isoform 2 of ATP synthase subunit alpha mitochondrial OS=Homo sapiens GN=ATP5A1              |
| Q9BXP5-5 SRRT_HUMAN  | 57.9  | 5  | 3 | 3 | 96223  | Isoform 5 of Serrate RNA effector molecule homolog OS=Homo sapiens GN=SRRT                   |
| Q9P258 RCC2_HUMAN    | 57.47 | 7  | 3 | 3 | 56085  | Protein RCC2 OS=Homo sapiens GN=RCC2 PE=1 SV=2                                               |
| Q96AE4 FUBP1_HUMAN   | 55.94 | 5  | 3 | 2 | 67560  | Far upstream element-binding protein 1 OS=Homo sapiens GN=FUBP1 PE=1 SV=3                    |
| P06748-3 NPM_HUMAN   | 55.73 | 8  | 2 | 2 | 28400  | Isoform 3 of Nucleophosmin OS=Homo sapiens GN=NPM1                                           |
| P08621-2 RU17_HUMAN  | 55.25 | 4  | 2 | 2 | 50618  | Isoform 2 of U1 small nuclear ribonucleoprotein 70 kDa OS=Homo sapiens GN=SNRNP70            |
| P62987 RL40_HUMAN    | 54.55 | 11 | 2 | 2 | 14728  | Ubiquitin-60S ribosomal protein L40 OS=Homo sapiens GN=UBA52 PE=1 SV=2                       |
| O60341 KDM1A_HUMAN   | 54.39 | 4  | 2 | 2 | 92903  | Lysine-specific histone demethylase 1A OS=Homo sapiens GN=KDM1A PE=1 SV=2                    |
| Q99733 NP1L4_HUMAN   | 52.22 | 5  | 2 | 1 | 42823  | Nucleosome assembly protein 1-like 4 OS=Homo sapiens GN=NAP1L4 PE=1 SV=1                     |

|                      |       |    |   |   |        |                                                                                                                                            |
|----------------------|-------|----|---|---|--------|--------------------------------------------------------------------------------------------------------------------------------------------|
| P20700 LMNB1_HUMAN   | 51.85 | 2  | 2 | 2 | 66408  | Lamin-B1 OS=Homo sapiens GN=LMNB1 PE=1 SV=2                                                                                                |
| Q9Y5B9 SP16H_HUMAN   | 48.33 | 2  | 2 | 2 | 119914 | FACT complex subunit SPT16 OS=Homo sapiens GN=SUPT16H PE=1 SV=1                                                                            |
| Q14241 ELOA1_HUMAN   | 47.14 | 2  | 2 | 2 | 89909  | Transcription elongation factor B polypeptide 3 OS=Homo sapiens GN=TCEB3 PE=1 SV=2                                                         |
| P62805 H4_HUMAN      | 45.15 | 30 | 3 | 3 | 11367  | Histone H4 OS=Homo sapiens GN=HIST1H4A PE=1 SV=2                                                                                           |
| P17987 TCPA_HUMAN    | 44.76 | 4  | 2 | 2 | 60344  | T-complex protein 1 subunit alpha OS=Homo sapiens GN=TCP1 PE=1 SV=1                                                                        |
| P27694 RFA1_HUMAN    | 44.53 | 3  | 2 | 2 | 68138  | Replication protein A 70 kDa DNA-binding subunit OS=Homo sapiens GN=RPA1 PE=1 SV=2                                                         |
| P57053 H2BFS_HUMAN   | 44.04 | 8  | 2 | 2 | 13944  | Histone H2B type F-S OS=Homo sapiens GN=H2BFS PE=1 SV=2                                                                                    |
| P16403 H12_HUMAN     | 43.14 | 4  | 1 | 1 | 21365  | Histone H1.2 OS=Homo sapiens GN=HIST1H1C PE=1 SV=2                                                                                         |
| Q14566 MCM6_HUMAN    | 42.98 | 1  | 1 | 1 | 92889  | DNA replication licensing factor MCM6 OS=Homo sapiens GN=MCM6 PE=1 SV=1                                                                    |
| O43175 SERA_HUMAN    | 41.07 | 4  | 2 | 2 | 56651  | D-3-phosphoglycerate dehydrogenase OS=Homo sapiens GN=PHGDH PE=1 SV=4                                                                      |
| P50991 TCPD_HUMAN    | 40.87 | 2  | 1 | 1 | 57924  | T-complex protein 1 subunit delta OS=Homo sapiens GN=CCT4 PE=1 SV=4                                                                        |
| O60506-4 HNRPQ_HUMAN | 40.58 | 2  | 1 | 1 | 58736  | Isoform 4 of Heterogeneous nuclear ribonucleoprotein Q OS=Homo sapiens GN=SYNCRIP                                                          |
| P13929-2 ENOB_HUMAN  | 39.88 | 6  | 2 | 1 | 44115  | Isoform 2 of Beta-enolase OS=Homo sapiens GN=ENO3                                                                                          |
| P12277 KCRB_HUMAN    | 39.26 | 4  | 2 | 2 | 42644  | Creatine kinase B-type OS=Homo sapiens GN=CKB PE=1 SV=1                                                                                    |
| P42166 LAP2A_HUMAN   | 38.5  | 3  | 2 | 1 | 75492  | Lamina-associated polypeptide 2 isoform alpha OS=Homo sapiens GN=TMPO PE=1 SV=2                                                            |
| Q3SY69 AL1L2_HUMAN   | 38.43 | 2  | 1 | 1 | 101746 | Mitochondrial 10-formyltetrahydrofolate dehydrogenase OS=Homo sapiens GN=ALDH1L2 PE=1 SV=2                                                 |
| P35659 DEK_HUMAN     | 38.39 | 7  | 2 | 2 | 42674  | Protein DEK OS=Homo sapiens GN=DEK PE=1 SV=1                                                                                               |
| P22314-2 UBA1_HUMAN  | 37.28 | 1  | 1 | 1 | 113800 | Isoform 2 of Ubiquitin-like modifier-activating enzyme 1 OS=Homo sapiens GN=UBA1                                                           |
| P55072 TERA_HUMAN    | 36.9  | 2  | 1 | 1 | 89322  | Transitional endoplasmic reticulum ATPase OS=Homo sapiens GN=VCP PE=1 SV=4                                                                 |
| Q1KMD3 HNRL2_HUMAN   | 36.76 | 2  | 1 | 1 | 85105  | Heterogeneous nuclear ribonucleoprotein U-like protein 2 OS=Homo sapiens GN=HNRNPUL2 PE=1 SV=1                                             |
| P11940-2 PABP1_HUMAN | 36.31 | 2  | 1 | 1 | 61181  | Isoform 2 of Polyadenylate-binding protein 1 OS=Homo sapiens GN=PABPC1                                                                     |
| Q53GS9-3 SNUT2_HUMAN | 35.42 | 2  | 1 | 1 | 56359  | Isoform 3 of U4/U6.U5 tri-snRNP-associated protein 2 OS=Homo sapiens GN=USP39                                                              |
| P42167 LAP2B_HUMAN   | 34.34 | 4  | 2 | 1 | 50670  | Lamina-associated polypeptide 2 isoforms beta/gamma OS=Homo sapiens GN=TMPO PE=1 SV=2                                                      |
| Q9Y383-3 LC7L2_HUMAN | 34.05 | 3  | 1 | 1 | 46229  | Isoform 3 of Putative RNA-binding protein Luc7-like 2 OS=Homo sapiens GN=LUC7L2                                                            |
| Q14974 IMB1_HUMAN    | 32.68 | 1  | 1 | 1 | 97170  | Importin subunit beta-1 OS=Homo sapiens GN=KPNB1 PE=1 SV=2                                                                                 |
| Q9HAV4 XPO5_HUMAN    | 32.09 | 1  | 1 | 1 | 136311 | Exportin-5 OS=Homo sapiens GN=XPO5 PE=1 SV=1                                                                                               |
| Q13085-3 ACACA_HUMAN | 31.92 | 1  | 1 | 1 | 257236 | Isoform 3 of Acetyl-CoA carboxylase 1 OS=Homo sapiens GN=ACACA                                                                             |
| Q5SSJ5 HP1B3_HUMAN   | 31.7  | 1  | 1 | 1 | 61207  | Heterochromatin protein 1-binding protein 3 OS=Homo sapiens GN=HP1BP3 PE=1 SV=1                                                            |
| P14868-2 SYDC_HUMAN  | 31.43 | 2  | 1 | 1 | 45771  | Isoform 2 of Aspartate--tRNA ligase cytoplasmic OS=Homo sapiens GN=DARS                                                                    |
| Q13428-2 TCOF_HUMAN  | 31.11 | 1  | 1 | 1 | 144314 | Isoform 2 of Treacle protein OS=Homo sapiens GN=TCOF1                                                                                      |
| P35499 SCN4A_HUMAN   | 30.65 | 1  | 1 | 1 | 208060 | Sodium channel protein type 4 subunit alpha OS=Homo sapiens GN=SCN4A PE=1 SV=4                                                             |
| Q92499-2 DDX1_HUMAN  | 30.1  | 1  | 1 | 1 | 69556  | Isoform 2 of ATP-dependent RNA helicase DDX1 OS=Homo sapiens GN=DDX1                                                                       |
| Q8WXF1-2 PSPC1_HUMAN | 29.28 | 4  | 1 | 1 | 45571  | Isoform 2 of Paraspeckle component 1 OS=Homo sapiens GN=PSPC1                                                                              |
| P11182 ODB2_HUMAN    | 29.14 | 2  | 1 | 1 | 53487  | Lipoamide acyltransferase component of branched-chain alpha-keto acid dehydrogenase complex mitochondrial OS=Homo sapiens GN=DBT PE=1 SV=3 |
| P11216 PYGB_HUMAN    | 28.81 | 2  | 1 | 1 | 96696  | Glycogen phosphorylase brain form OS=Homo sapiens GN=PYGB PE=1 SV=5                                                                        |
| Q86V81 THOC4_HUMAN   | 28.39 | 4  | 1 | 1 | 26888  | THO complex subunit 4 OS=Homo sapiens GN=ALYREF PE=1 SV=3                                                                                  |
| P52209-2 6PGD_HUMAN  | 28.31 | 2  | 1 | 1 | 51872  | Isoform 2 of 6-phosphogluconate dehydrogenase decarboxylating OS=Homo sapiens GN=PGD                                                       |
| Q6MZZ7-2 CAN13_HUMAN | 28.3  | 2  | 1 | 1 | 48003  | Isoform 2 of Calpain-13 OS=Homo sapiens GN=CAPN13                                                                                          |

|                      |       |   |   |   |        |                                                                                          |
|----------------------|-------|---|---|---|--------|------------------------------------------------------------------------------------------|
| Q9Y2L1-2 RRP44_HUMAN | 25.82 | 1 | 1 | 1 | 105040 | Isoform 2 of Exosome complex exonuclease RRP44 OS=Homo sapiens GN=DIS3                   |
| Q9NVP1 DDX18_HUMAN   | 24.44 | 1 | 1 | 1 | 75407  | ATP-dependent RNA helicase DDX18 OS=Homo sapiens GN=DDX18 PE=1 SV=2                      |
| P68431 H31_HUMAN     | 24.35 | 6 | 1 | 1 | 15404  | Histone H3.1 OS=Homo sapiens GN=HIST1H3A PE=1 SV=2                                       |
| P24468-3 COT2_HUMAN  | 23.86 | 4 | 1 | 1 | 29163  | Isoform 3 of COUP transcription factor 2 OS=Homo sapiens GN=NR2F2                        |
| P20264 PO3F3_HUMAN   | 23.82 | 3 | 1 | 1 | 50327  | POU domain class 3 transcription factor 3 OS=Homo sapiens GN=POU3F3 PE=2 SV=2            |
| O00203-3 AP3B1_HUMAN | 23.81 | 1 | 1 | 1 | 116195 | Isoform 2 of AP-3 complex subunit beta-1 OS=Homo sapiens GN=AP3B1                        |
| Q9ULU8-2 CAPS1_HUMAN | 23.8  | 1 | 1 | 1 | 144083 | Isoform 2 of Calcium-dependent secretion activator 1 OS=Homo sapiens GN=CADPS            |
| Q93009-3 UBP7_HUMAN  | 23.67 | 1 | 1 | 1 | 126269 | Isoform 3 of Ubiquitin carboxyl-terminal hydrolase 7 OS=Homo sapiens GN=USP7             |
| O75444 MAF_HUMAN     | 22.98 | 5 | 1 | 1 | 38492  | Transcription factor Maf OS=Homo sapiens GN=MAF PE=1 SV=2                                |
| P20023-2 CR2_HUMAN   | 22.83 | 1 | 1 | 1 | 110408 | Isoform B of Complement receptor type 2 OS=Homo sapiens GN=CR2                           |
| Q96SB4-4 SRPK1_HUMAN | 22.5  | 1 | 1 | 1 | 72384  | Isoform 3 of SRSF protein kinase 1 OS=Homo sapiens GN=SRPK1                              |
| Q86VP6 CAND1_HUMAN   | 22.17 | 1 | 1 | 1 | 136375 | Cullin-associated NEDD8-dissociated protein 1 OS=Homo sapiens GN=CAND1 PE=1 SV=2         |
| Q15782-5 CH3L2_HUMAN | 22    | 4 | 1 | 1 | 34633  | Isoform 2 of Chitinase-3-like protein 2 OS=Homo sapiens GN=CHI3L2                        |
| Q9NZI8 IF2B1_HUMAN   | 21.92 | 2 | 1 | 1 | 63481  | Insulin-like growth factor 2 mRNA-binding protein 1 OS=Homo sapiens GN=IGF2BP1 PE=1 SV=2 |
| Q8NFD5 ARI1B_HUMAN   | 21.87 | 1 | 1 | 1 | 236121 | AT-rich interactive domain-containing protein 1B OS=Homo sapiens GN=ARID1B PE=1 SV=2     |
| P56192-2 SYMC_HUMAN  | 21.67 | 2 | 1 | 1 | 61816  | Isoform 2 of Methionine--tRNA ligase cytoplasmic OS=Homo sapiens GN=MARS                 |
| O94842-2 TOX4_HUMAN  | 21.62 | 3 | 1 | 1 | 63821  | Isoform 2 of TOX high mobility group box family member 4 OS=Homo sapiens GN=TOX4         |
| P54802 ANAG_HUMAN    | 21.02 | 1 | 1 | 1 | 82266  | Alpha-N-acetylglucosaminidase OS=Homo sapiens GN=NAGLU PE=1 SV=2                         |
| Q96F45-2 ZN503_HUMAN | 20.31 | 3 | 1 | 1 | 59292  | Isoform 2 of Zinc finger protein 503 OS=Homo sapiens GN=ZNF503                           |
| Q9P2K5-2 MYEF2_HUMAN | 20.07 | 2 | 1 | 1 | 61929  | Isoform 2 of Myelin expression factor 2 OS=Homo sapiens GN=MYEF2                         |
| Q96KP4 CNDP2_HUMAN   | 20.04 | 3 | 1 | 1 | 52879  | Cytosolic non-specific dipeptidase OS=Homo sapiens GN=CNDP2 PE=1 SV=2                    |
| Q9Y566-3 SHAN1_HUMAN | 20.03 | 1 | 1 | 1 | 224129 | Isoform 3 of SH3 and multiple ankyrin repeat domains protein 1 OS=Homo sapiens GN=SHANK1 |
| Q7Z5P9-2 MUC19_HUMAN | 20.01 | 0 | 1 | 1 | 564168 | Isoform 2 of Mucin-19 OS=Homo sapiens GN=MUC19                                           |

**Supplementary Table 2: Residual distance Between residues at Wild Type and Mutated state for SET8**

| <b>Residue positions</b> | <b>Type</b> | <b>Distance between residues (in Å)</b> |
|--------------------------|-------------|-----------------------------------------|
| <b>86-158</b>            | Wild Type   | 48.4                                    |
| <b>86-158</b>            | Mutant      | 43.4                                    |
| <b>86-159</b>            | Wild Type   | 51.4                                    |
| <b>86-159</b>            | Mutant      | 41.2                                    |
| <b>86-162</b>            | Wild Type   | 50.4                                    |
| <b>86-162</b>            | Mutant      | 38.2                                    |
| <b>86-164</b>            | Wild Type   | 45.8                                    |
| <b>86-164</b>            | Mutant      | 43.2                                    |
| <b>86-168</b>            | Wild Type   | 36.6                                    |
| <b>86-168</b>            | Mutant      | 50.7                                    |
| <b>86-169</b>            | Wild Type   | 39.4                                    |
| <b>86-169</b>            | Mutant      | 50.6                                    |
| <b>86-170</b>            | Wild Type   | 42.4                                    |
| <b>86-170</b>            | Mutant      | 49.5                                    |
| <b>86-174</b>            | Wild Type   | 40                                      |
| <b>86-174</b>            | Mutant      | 54.7                                    |
| <b>158-168</b>           | Wild Type   | 13.3                                    |
| <b>158-168</b>           | Mutant      | 19                                      |
| <b>158-169</b>           | Wild Type   | 10.6                                    |
| <b>158-169</b>           | Mutant      | 20.4                                    |
| <b>158-170</b>           | Wild Type   | 9.3                                     |
| <b>158-170</b>           | Mutant      | 17.1                                    |
| <b>158-174</b>           | Wild Type   | 17.4                                    |
| <b>158-174</b>           | Mutant      | 16.2                                    |

|                |           |      |
|----------------|-----------|------|
| <b>162-168</b> | Wild Type | 17.4 |
| <b>162-168</b> | Mutant    | 15.8 |
| <b>162-169</b> | Wild Type | 15.5 |
| <b>162-169</b> | Mutant    | 17   |
| <b>162-170</b> | Wild Type | 14.6 |
| <b>162-170</b> | Mutant    | 14.7 |
| <b>162-174</b> | Wild Type | 23.2 |
| <b>162-174</b> | Mutant    | 17.7 |



## Supplementary File 1: All primer sequences mentioned in the “Methods” section

Primer used for mutagenesis:

SET8-K86-F  
/5Phos/GCCGGAATCTACAGGAAACGAGAAGAGAAAAG  
SET8-K86A-R  
/5Phos/TAATGGTGCCCCCTGGCATTGACTTCGTGATG  
SET8-157-R  
/5Phos/CAGGGCTTGCTTGGCGATGGCTGCATTGGT  
SET8-K158/9/162/4A-F  
/5Phos/GCAGCGCCCATCGCGGGCGCACAGGCC  
SET8-165aa-F  
/5Phos/AGGCCCGGAAAAAAGCTCAAGGAAAAACG  
SET8-165aa-R  
/5Phos/GTTTGCCCTTGATGGGCTTTTCAGGGCTTGC  
SET8-R168K169K170A-F  
/5Phos/AGGCCCGGCGAGCAGCAGCTCAAGGAAAAACG  
SET8-K159A-R  
/5Phos/GTTTGCCCTTGATGGGCGCTTTCAGGGCTTGC

Primer used for cloning:

GST-SET8-1-F  
CGTCAGGGATCCCCGCTAGAGGCAGGAAGATGTCCAAGCCC  
GST-SET8-352-R  
CGTCAGGGATTCTTAATGCTTCAGCCACGGGTGGGCTTC  
GST-SET8-81-F  
CGTCAGGGATCCCCGAAGTCAAATGCCAGGGGAAACCATTAGCC  
GST-SET8-230-R  
CGTCAGGAATTCCACACCCCTGCCTTTGCCATCGATGAG  
GST-SET8-80-R  
AGTCGTGAATTCTTCGTGATGTGTAAGTCTCTCCTCCTG  
GST-SET8-90-R  
CGTCAGGAATTCGATTCCGGCTAATGGTTTCCCCTG  
GST-SET8-98-F  
CGTCAGGGATCCCCAGAAATGCTGGGAACGCAGTACGG  
GST-SET8-108-F  
CGTCAGGGATCCCCATGAAGTCCGAGGAACAGAAGATC  
GST-SET8-118-F  
CGTCAGGGATCCCCGCCAGGAAAGGTCCCCTGGTACCT  
GST-SET8-155-R  
CGTCAGGGAATTCTTGCTTGGCGATGGCTGCATTGGT  
GST-SET8-157-F  
CGTCAGGAATCCCCAAAAAGCCCATCAAGGGC  
GST-SET8-170-F

CGTCAGGAATCCCCGCTCAAGGAAAAACGCAAC  
GST-SET8-180-F  
CGTCAGGAATCCCCCTTACGGATTTCTACCCT  
GST-SET8-190-F  
CGTCAGGGATCCCCTCCAGGAAGAGCAAAGCC  
GST-SET8-200-F  
CGTCAGGGATCCCCGAAGAAAGGAAAAGAATAGATGA  
GFP-SET8-1-F  
CGTCAGGAATTCGCTAGAGGCAGGAAGATGTCCAAGCC  
GFP-SET8-352-R  
CGTCAGGGATCCTTAATGCTTCAGCCACGGGT  
GST-PARP1-1-F  
CATCATGTGACCCGCGGAGTCTTCGGATAAGCTCTATCGA  
GST-PARP1-372-R  
CATCATGCGGCCGCCACAGCAGCAGGAGCCGA  
GST-PARP1-373-F  
CATCATGTGACCCGAAACCAGCGCCTCCGTG  
GST-PARP1-532-R  
CATCATGCGGCCGCGAATCAGGATCCACAGCTGCTCC  
GST-PARP1-533-F  
CATCATGTGACCCAAAGGAGGAGCAGCTGTGGAT  
GST-PARP1-1014-R  
CATCATGCGGCCGCTTACCACAGGGAGGTCTTAAAATTGAATTCAG  
3XFLAG-PARP1-1-F  
CATCATGCGGCCGCGGAGTCTTCGGATAAGCT  
3XFLAG-PARP1-1014-R  
CATCATAGATCTTTACCACAGGGAGGTCTTAAAATTGAA
