# Supplementary material for: Poly ADP-ribosylation of SET8 leads to aberrant H4K20 methylation in mammalian nuclear genome
Source: PubMed Central journal article supplement (PMC9700808; doi:10.1038/s42003-022-04241-8), 2022-11-25
Supplement: 42003_2022_4241_MOESM3_ESM.pdf [file 42003_2022_4241_MOESM3_ESM.pdf]

## Description of Additional Supplementary Files

**File name:** Supplementary Data 1

**Description:** The Source data for Supplementary Figure 13 and Figure 15

**File name:** Supplementary Data 2

**Description:** The Source data for Figure 5a-b

**File name:** Supplementary Data 3

**Description:** The Source data for Figure 3c

**File name:** Supplementary Data 4

**Description:** The Source data for Supplementary Figure 1a

**File name:** Supplementary Data 5

**Description:** The Source data for Figure 4b and Supplementary Figure 17b

**File name:** Supplementary Data 6

**Description:** The Source data for Supplementary Figure 12 and Supplementary Figure 14

**File name:** Supplementary Data 7

**Description:** The Source data for Supplementary Figure 16

**File name:** Supplementary Data 8

**Description:** The Source data for Figure 4c

**File name:** Supplementary Data 9

**Description:** RNA seq of genes post PARP1 knock down
